# Supplementary material for: Cerebellar nuclei excitatory neurons regulate developmental scaling of presynaptic Purkinje cell number and organ growth
Source: eLife journal article supplement (doi:10.7554/elife.50617), 2019-11-19
Supplement: supp [file elife-50617-supp-v1.zip]

Archive with 18 entries (18 files):
- elife_poa_e50617_Figure_7_figure_supplement_1.jpg
- elife_poa_e50617_Figure_5_figure_supplement_1.jpg
- elife_poa_e50617_Figure_1_source_data_1.pdf
- elife_poa_e50617_Figure_6_figure_supplement_1.jpg
- elife_poa_e50617_Figure_9_figure_supplement_1.jpg
- elife_poa_e50617_Figure_1_figure_supplement_2.jpg
- elife_poa_e50617_Transparent_Reporting_File.pdf
- elife_poa_e50617_Figure_4_figure_supplement_3.jpg
- elife_poa_e50617_Figure_1_figure_supplement_3.jpg
- elife_poa_e50617_Figure_4_figure_supplement_1.jpg
- elife_poa_e50617_Figure_5_figure_supplement_2.jpg
- elife_poa_e50617_Video_1.avi
- elife_poa_e50617_Figure_5_figure_supplement_3.jpg
- elife_poa_e50617_Figure_1_figure_supplement_1.jpg
- elife_poa_e50617_Figure_4_figure_supplement_2.jpg
- elife_poa_e50617_Figure_2_figure_supplement_1.jpg
- elife_poa_e50617_Video_2.avi
- elife_poa_e50617_Figure_7_figure_supplement_2.jpg
