# Supplementary material for: Cerebellar nuclei excitatory neurons regulate developmental scaling of presynaptic Purkinje cell number and organ growth
Source: eLife journal article supplement (doi:10.7554/elife.50617), 2019-11-19
Supplement: supp [file elife-50617-supp-v1.zip › elife_poa_e50617_Figure_1_source_data_1.pdf]

| Source Data_1 |                |                                        |                      |         |
|---------------|----------------|----------------------------------------|----------------------|---------|
| Figure        | Test performed | P-Value                                | Multiple comparisons |         |
| Fig. 1G       | Two-way ANOVA  | F (1, 6) = 43.14, P=0.0006             | Vermis               | 0.7725  |
|               |                |                                        | Paravermis           | 0.0004  |
|               |                |                                        | Hemisphere           | <0.0001 |
| Fig. 1H       | Two-way ANOVA  | F <sub>(1, 9)</sub> =398.277, P<0.0001 | ASec                 | <0.0001 |
|               |                |                                        | CSec                 | <0.0001 |
|               |                |                                        | PSec                 | 0.1498  |
| Fig.1I        | Two-way ANOVA  | F <sub>(1, 9)</sub> =0.2269, P=0.64    | ASec                 | 0.69    |
|               |                |                                        | CSec                 | 0.9661  |
|               |                |                                        | PSec                 | 0.9955  |
| Fig. 1J       | Two-way ANOVA  | F (1, 9) = 0.2269, P=0.6452            | ASec                 | 0.6918  |
|               |                |                                        | CSec                 | 0.9661  |
|               |                |                                        | PSec                 | 0.9955  |
| Fig. 1L       | Two-way ANOVA  | F (1, 15) = 72.52<br>P<0.0001          | ASec                 | <0.0001 |
|               |                |                                        | CSec                 | <0.0001 |
|               |                |                                        | PSec                 | 0.3064  |
| Fig. 1M       | Two-way ANOVA  | F (1, 15) = 0.2583<br>P=0.6187         | ASec                 | 0.9484  |
|               |                |                                        | CSec                 | 0.8998  |
|               |                |                                        | PSec                 | 0.8512  |
| Fig.1N        | Two-way ANOVA  | F (1, 9) = 0.8772<br>P=0.3734          | ASec                 | 0.3167  |
|               |                |                                        | CSec                 | 0.7412  |
|               |                |                                        | PSec                 | 0.6820  |
| Fig. 1O       | Two-way ANOVA  | F (1, 9) = 28.4 P=0.0005               | ASec                 | 0.0284  |
|               |                |                                        | CSec                 | 0.0031  |
|               |                |                                        | PSec                 | 0.5937  |
| Fig. 1Q       | Two-way ANOVA  | F (1, 12) = 32.29 P=0.0001             | MN                   | 0.0058  |
|               |                |                                        | IN                   | 0.0001  |
|               |                |                                        | LN                   | 0.8003  |
| Fig. 2A       | Two-way ANOVA  | F (1, 25) = 14.23 P=0.0009             | D1 run1              | >0.9999 |

|         |                  |                                                      |            |        |
|---------|------------------|------------------------------------------------------|------------|--------|
|         |                  |                                                      | D1 run2    | 0.1858 |
|         |                  |                                                      | D1 run3    | 0.2107 |
|         |                  |                                                      | D2 run1    | 0.2708 |
|         |                  |                                                      | D2 run2    | 0.2367 |
|         |                  |                                                      | D2 run3    | 0.1525 |
|         |                  |                                                      | D3 run1    | 0.0036 |
|         |                  |                                                      | D3 run2    | 0.1440 |
|         |                  |                                                      | D3 run3    | 0.1104 |
| Fig. 2B | Student's t-test | t(25)=3.772 P=0.0009                                 | N/A        |        |
| Fig. 2C | Student's t-test | t(26)=0.9552 P=0.34                                  | N/A        |        |
| Fig. 2D | Two-way ANOVA    | F (1, 75) = 8.227 P=0.0054                           | Stride     | 0.0023 |
|         |                  |                                                      | Sway       | 0.8102 |
|         |                  |                                                      | Stance     | 0.8834 |
| Fig. 3C | Student's t-test | aMN: t(4)=4.492 P=0.0109<br>pMN: t(4)=4.412 P=0.0116 | N/A        |        |
| Fig. 5C | Two-way ANOVA    | F (1, 24) = 8.042 P=0.0091                           | eCN+GCP    | 0.0213 |
|         |                  |                                                      | eCN        | 0.0169 |
|         |                  |                                                      | GCP        | 0.8873 |
| Fig. 5D | Two-way ANOVA    | F (1, 6) = 12.88 P=0.0115                            | Vermis     | 0.0016 |
|         |                  |                                                      | Paravermis | 0.0289 |
|         |                  |                                                      | Hemisphere | 0.5858 |
| Fig. 5E | Two-way ANOVA    | F (1, 10) = 8.34 P=0.0162                            | Vermis     | 0.0082 |
|         |                  |                                                      | Paravermis | 0.1806 |
|         |                  |                                                      | Hemisphere | 0.8096 |
| Fig. 5F | Two-way ANOVA    | F (1, 18) = 22.07 P=0.0002                           | ASec       | 0.0005 |
|         |                  |                                                      | CSec       | 0.0848 |

|         |               |                               |      |         |
|---------|---------------|-------------------------------|------|---------|
|         |               |                               | PSec | 0.6617  |
| Fig. 5G | Two-way ANOVA | F (1, 18) = 2.652 P=0.1208    | ASec | 0.4868  |
|         |               |                               | CSec | 0.5646  |
|         |               |                               | PSec | 0.9899  |
| Fig. 5H | Two-way ANOVA | F (1, 6) = 0.1723 P=0.6925    | ASec | 0.9768  |
|         |               |                               | CSec | 0.9966  |
|         |               |                               | PCec | 0.9879  |
| Fig. 5I | Two-way ANOVA | F (1, 18) = 32.51 P<0.0001    | ASec | <0.0001 |
|         |               |                               | CSec | 0.0153  |
|         |               |                               | PSec | 0.8086  |
| Fig. 5J | Two-way ANOVA | F (1, 18) = 0.0185 P=0.8933   | ASec | >0.9999 |
|         |               |                               | CSec | 0.5136  |
|         |               |                               | PSec | 0.6586  |
| Fig. 5K | Two-way ANOVA | F (1, 18) = 0.06465 P=0.8022  | ASec | 0.9932  |
|         |               |                               | CSec | 0.9818  |
|         |               |                               | PSec | 0.9346  |
| Fig. 5L | Two-way ANOVA | F (1, 18) = 0.002591 P=0.9600 | ASec | 0.7930  |
|         |               |                               | CSec | 0.8317  |
|         |               |                               | PSec | >0.9999 |
| Fig. 5M | Two-way ANOVA | F (1, 36) = 12.4 P=0.0012     | ASec | 0.0056  |
|         |               |                               | CSec | 0.2819  |
|         |               |                               | PSec | 0.6417  |
| Fig. 5N | Two-way ANOVA | F (1, 36) = 1.511 P=0.2269    | ASec | 0.7862  |
|         |               |                               | CSec | 0.9789  |
|         |               |                               | PSec | 0.7394  |

|         |                   |                                |              |         |
|---------|-------------------|--------------------------------|--------------|---------|
| Fig. 5O | Two-way ANOVA     | F (1, 36) = 0.135<br>P=0.7155  | ASec         | 0.7730  |
|         |                   |                                | CSec         | 0.9979  |
|         |                   |                                | PSec         | 0.9715  |
| Fig. 5P | Two-way ANOVA     | F (1, 36) = 13.5<br>P=0.0008   | ASec         | 0.0048  |
|         |                   |                                | CSec         | 0.0543  |
|         |                   |                                | PSec         | 0.9512  |
| Fig. 5Q | Two-way ANOVA     | F (1, 36) = 0.6296<br>P=0.4327 | ASec         | 0.5705  |
|         |                   |                                | CSec         | 0.7100  |
|         |                   |                                | PSec         | 0.5812  |
| Fig. 5R | Two-way ANOVA     | F (1, 36) = 3.092<br>P=0.0872  | ASec         | 0.9382  |
|         |                   |                                | CSec         | 0.5312  |
|         |                   |                                | PSec         | 0.5021  |
| Fig. 5S | Two-way ANOVA     | F (1, 36) = 0.5289<br>P=0.4718 | ASec         | 0.7400  |
|         |                   |                                | CSec         | >0.9999 |
|         |                   |                                | PSec         | 0.9805  |
| Fig. 6B | Two-way ANOVA     | F (1, 24) = 10.26<br>P=0.0038  | eCN+GCP      | 0.0105  |
|         |                   |                                | eCN          | 0.0008  |
|         |                   |                                | GCP          | 0.5910  |
| Fig. 6E | One sampe t-tests | t(3)=3.894                     | MN (eCN+GCP) | 0.0300  |
|         |                   | t(3)=4.919                     | IN (eCN+GCP) | 0.0161  |
|         |                   | t(3)=0.2765                    | LN (eCN+GCP) | 0.8001  |
|         |                   | t(6)=10.31, df=6               | MN (eCN)     | <0.0001 |
|         |                   | t(6)=12.32, df=6               | IN (eCN)     | <0.0001 |
|         |                   | t(6)=0.8325, df=6              | LN (eCN)     | 0.4370  |

|         |                  |                                     |            |         |
|---------|------------------|-------------------------------------|------------|---------|
| Fig. 6C | Two-way ANOVA    | $F(1, 120) = 63.33$<br>$P < 0.0001$ |            |         |
| Fig. 6D | Two-way ANOVA    | $F(1, 240) = 104.4$<br>$P < 0.0001$ |            |         |
| Fig. 6E | Student's t-test | $t(6) = 0.84$ , $P = 0.43$          | N/A        |         |
| Fig. 6F | Student's t-test | $t(6) = 2.88$ , $P = 0.02$          | N/A        |         |
| Fig. 7E | Student's t-test | $t(4) = 0.84$ , $P = 0.44$          | N/A        |         |
| Fig. 7F | Student's t-test | $t(4) = 3.08$ , $P = 0.036$         | N/A        |         |
| Fig. 7S | Two-way ANOVA    | $F(1, 42) = 2.182$<br>$P = 0.1471$  |            |         |
| Fig. 7T | Two-way ANOVA    | $F(1, 42) = 23.67$<br>$P < 0.0001$  |            |         |
| Fig. 7U | Student's t-test | $t(4) = 0.437$ , $P = 0.68$         | N/A        |         |
| Fig. 7V | Student's t-test | $t(4) = 8.96$ , $P = 0.0009$        | N/A        |         |
| Fig. 8B | Student's t-test | $t(4) = 7.6$ , $P = 0.0016$         | N/A        |         |
| Fig. 8C | Two-way ANOVA    | $F(1, 88) = 52.48$<br>$P < 0.0001$  |            |         |
| Fig. 8H | Two-way ANOVA    | $F(1, 4) = 19.47$<br>$P = 0.0116$   | Vermis     | 0.0024  |
|         |                  |                                     | Paravermis | 0.0330  |
|         |                  |                                     | Hemisphere | 0.0339  |
| Fig. 8I | Two-way ANOVA    | $F(1, 6) = 675.2$<br>$P < 0.0001$   | Vermis     | <0.0001 |
|         |                  |                                     | Paravermis | <0.0001 |
|         |                  |                                     | Hemisphere | <0.0001 |
| Fig. 8J | Student's t-test | $t(4) = 3.165$ , $P = 0.034$        | N/A        |         |
| Fig. 8K | Two-way ANOVA    | $F(1, 12) = 0.1364$<br>$P = 0.7184$ | Vermis     | 0.9847  |
|         |                  |                                     | Paravermis | 0.9046  |
|         |                  |                                     | Hemisphere | 0.3594  |
| Fig. 8L | Two-way ANOVA    | $F(1, 12) = 2.578$<br>$P = 0.1343$  | Vermis     | 0.4274  |
|         |                  |                                     | Paravermis | 0.8176  |
|         |                  |                                     | Hemisphere | 0.9453  |

|                      |                  |                                   |      |         |
|----------------------|------------------|-----------------------------------|------|---------|
|                      |                  |                                   |      |         |
| Fig. 8M              | Student's t-test | $t(4)=1.408$ , $P=0.23$           | N/A  |         |
| Fig. 8R              | Student's t-test | $(4)=0.922$ , $P=0.4$             | N/A  |         |
| Figure 1_fig. supp1A | Two-way ANOVA    | $F(1, 9) = 44.48$<br>$P<0.0001$   | ASec | 0.0134  |
|                      |                  |                                   | CSec | 0.0002  |
|                      |                  |                                   | PSec | 0.8443  |
| Figure 1_fig. supp1B | Two-way ANOVA    | $F_{(1,9)}=98.8$ , $P<0.0001$     | ASec | 0.0001  |
|                      |                  |                                   | CSec | 0.0002  |
|                      |                  |                                   | PSec | 0.7396  |
| Figure 1_fig. supp1C | Two-way ANOVA    | $F_{(1,9)}=278.3$ , $P<0.0001$    | ASec | 0.0001  |
|                      |                  |                                   | CSec | 0.0001  |
|                      |                  |                                   | PSec | 0.2706  |
| Figure 1_fig. supp1D | Two-way ANOVA    | $F(1, 12) = 17.32$<br>$P=0.0013$  | ASec | 0.0470  |
|                      |                  |                                   | CSec | 0.0002  |
|                      |                  |                                   | PSec | 0.3781  |
| Figure 1_fig. supp1E | Two-way ANOVA    | $F(1, 12) = 41.63$<br>$P<0.0001$  | ASec | 0.0202  |
|                      |                  |                                   | CSec | <0.0001 |
|                      |                  |                                   | PSec | 0.8472  |
| Figure 1_fig. supp1F | Two-way ANOVA    | $F(1, 12) = 42.43$<br>$P<0.0001$  | ASec | 0.0008  |
|                      |                  |                                   | CSec | 0.0009  |
|                      |                  |                                   | PSec | 0.5895  |
| Figure 1_fig. supp1G | Two-way ANOVA    | $F(1, 12) = 1.72$ $P=0.2142$      | ASec | 0.9914  |
|                      |                  |                                   | CSec | 0.9955  |
|                      |                  |                                   | PSec | 0.2662  |
| Figure 1_fig. supp1H | Two-way ANOVA    | $F(1, 12) = 0.1698$<br>$P=0.6875$ | ASec | 0.8758  |
|                      |                  |                                   | CSec | 0.7713  |
|                      |                  |                                   | PSec | 0.7597  |
| Figure 1_fig. supp1I | Two-way ANOVA    | $F(1, 6) = 7.501$<br>$P=0.0338$   | ASec | 0.1522  |
|                      |                  |                                   | CSec | 0.4242  |

|                      |                  |                              |           |        |
|----------------------|------------------|------------------------------|-----------|--------|
|                      |                  |                              | PSec      | 0.8468 |
| Figure 1_fig. supp1J | Two-way ANOVA    | F (1, 6) = 0.02607 P=0.8770  | ASec      | 0.5575 |
|                      |                  |                              | CSec      | 0.5659 |
|                      |                  |                              | PSec      | 0.1667 |
| Figure 1_fig. supp1K | Two-way ANOVA    | F (1, 6) = 4.284 P=0.0839    | ASec      | 0.9969 |
|                      |                  |                              | CSec      | 0.5816 |
|                      |                  |                              | PSec      | 0.1317 |
| Figure 1_fig. supp1L | Two-way ANOVA    | F (1, 6) = 2.241 P=0.1850    | ASec      | 0.5676 |
|                      |                  |                              | CSec      | 0.8843 |
|                      |                  |                              | PSec      | 0.9190 |
| Figure 1_fig. supp1M | Student's t-test | t(5)=6.397 P=0.014           | N/A       |        |
| Figure 1_fig. supp2C | Two-way ANOVA    | F (1, 12) = 0.01486 P=0.9050 | ASec      | 0.8807 |
|                      |                  |                              | CSec      | 0.9996 |
|                      |                  |                              | PSec      | 0.8227 |
| Figure 2_fig. sup1A  | Two-way ANOVA    | F (1, 225) = 42.34 P<0.0001  | Day1 run1 | 0.9761 |
|                      |                  |                              | Day1 run2 | 0.2416 |
|                      |                  |                              | Day1 run3 | 0.0372 |
|                      |                  |                              | Day2 run1 | 0.3866 |
|                      |                  |                              | Day2 run2 | 0.1943 |
|                      |                  |                              | Day2 run3 | 0.5126 |
|                      |                  |                              | Day3 run1 | 0.0352 |
|                      |                  |                              | Day3 run2 | 0.2269 |
|                      |                  |                              | Day1 run3 | 0.1559 |
| Figure 2_fig. sup1B  | Student's t-test | t(15)=2.683 P=0.02           | N/A       |        |

|                        |                     |                                  |        |         |
|------------------------|---------------------|----------------------------------|--------|---------|
| Figure 2_fig.<br>sup1C | Student's<br>t-test | $t(15)=3.656$ $P=0.002$          | N/A    |         |
| Figure 2_fig.<br>sup1E | Two-way<br>ANOVA    | $F(1, 75) = 16.97$ $P<0.0001$    | Stride | <0.0001 |
|                        |                     |                                  | Sway   | 0.5801  |
|                        |                     |                                  | Stance | 0.1657  |
| Figure 5_fig.<br>sup2A | Two-way<br>ANOVA    | $F(1, 6) = 17.56$ $P=0.0057$     | ASec   | 0.0017  |
|                        |                     |                                  | CSec   | 0.2645  |
|                        |                     |                                  | PSec   | 0.5519  |
| Figure 5_fig.<br>sup2B | Two-way<br>ANOVA    | $F(1, 18) = 5.284$ $P=0.0337$    | ASec   | 0.0324  |
|                        |                     |                                  | CSec   | 0.9999  |
|                        |                     |                                  | PSec   | 0.6498  |
| Figure 5_fig.<br>sup2C | Two-way<br>ANOVA    | $F(1, 18) = 1.297$ $P=0.2697$    | ASec   | 0.9709  |
|                        |                     |                                  | CSec   | 0.9319  |
|                        |                     |                                  | PSec   | 0.6845  |
| Figure 5_fig.<br>sup2D | Two-way<br>ANOVA    | $F(1, 18) = 0.008472$ $P=0.9277$ | ASec   | 0.5110  |
|                        |                     |                                  | CSec   | 0.2643  |
|                        |                     |                                  | PSec   | 0.9879  |
| Figure 5_fig.<br>sup2E | Two-way<br>ANOVA    | $F(1, 18) = 0.1478$ $P=0.7051$   | ASec   | 0.5812  |
|                        |                     |                                  | CSec   | 0.6454  |
|                        |                     |                                  | PSec   | 0.8375  |
| Figure 5_fig.<br>sup2F | Two-way<br>ANOVA    | $F(1, 18) = 2.328$ $P=0.1444$    | ASec   | 0.9949  |
|                        |                     |                                  | CSec   | 0.2276  |
|                        |                     |                                  | PSec   | 0.9185  |
| Figure 5_fig.<br>sup2G | Two-way<br>ANOVA    | $F(1, 18) = 5.808$ $P=0.0269$    | ASec   | 0.1167  |
|                        |                     |                                  | CSec   | 0.6713  |
|                        |                     |                                  | PSec   | 0.7484  |

|                     |               |                                   |      |         |
|---------------------|---------------|-----------------------------------|------|---------|
|                     |               |                                   |      |         |
| Figure 5_fig. sup2H | Two-way ANOVA | F (1, 18) = 5.633<br>P=0.0290     | ASec | 0.0103  |
|                     |               |                                   | CSec | 0.9998  |
|                     |               |                                   | PSec | 0.8085  |
| Figure 5_fig. sup2I | Two-way ANOVA | F (1, 9) = 0.187<br>P=0.6756      | ASec | 0.9333  |
|                     |               |                                   | CSec | 0.9996  |
|                     |               |                                   | PSec | 0.9893  |
| Figure 5_fig. sup2J | Two-way ANOVA | F (1, 30) = 0.7102<br>P=0.4061    | ASec | 0.9998  |
|                     |               |                                   | CSec | 0.9833  |
|                     |               |                                   | PSec | 0.6580  |
| Figure 5_fig. sup2K | Two-way ANOVA | F (1, 30) = 1.469<br>P=0.2349     | ASec | 0.9999  |
|                     |               |                                   | CSec | 0.7447  |
|                     |               |                                   | PSec | 0.6153  |
| Figure 5_fig. sup2L | Two-way ANOVA | F (1, 36) = 0.01968<br>P=0.8892   | ASec | 0.9997  |
|                     |               |                                   | CSec | 0.9998  |
|                     |               |                                   | PSec | 0.9934  |
| Figure 5_fig. sup3A | Two-way ANOVA | F (1, 18) = 0.0002414<br>P=0.9878 | ASec | 0.9950  |
|                     |               |                                   | CSec | >0.9999 |
|                     |               |                                   | PSec | 0.9884  |
| Figure 5_fig. sup3B | Two-way ANOVA | F (1, 18) = 0.006082<br>P=0.9387  | ASec | >0.9999 |
|                     |               |                                   | CSec | >0.9999 |
|                     |               |                                   | PSec | >0.9999 |
| Figure 5_fig. sup3C | Two-way ANOVA | F (1, 18) = 1.211<br>P=0.2856     | ASec | 0.9897  |
|                     |               |                                   | CSec | 0.6696  |
|                     |               |                                   | PSec | 0.9207  |
|                     |               |                                   | ASec | 0.9994  |

|                     |                  |                                   |      |         |
|---------------------|------------------|-----------------------------------|------|---------|
| Figure 5_fig. sup3D | Two-way ANOVA    | F (1, 18) = 5.243<br>P=0.0343     |      |         |
|                     |                  |                                   | CSec | 0.0516  |
|                     |                  |                                   | PSec | 0.4111  |
| Figure 5_fig. sup3E | Two-way ANOVA    | F (1, 18) = 30.22<br>P<0.0001     | ASec | 0.2963  |
|                     |                  |                                   | CSec | 0.0002  |
|                     |                  |                                   | PSec | 0.0363  |
| Figure 5_fig. sup3F | Two-way ANOVA    | F (1, 18) = 0.0002414<br>P=0.9878 | ASec | 0.9950  |
|                     |                  |                                   | CSec | >0.9999 |
|                     |                  |                                   | PSec | 0.9884  |
| Figure 5_fig. sup3G | Two-way ANOVA    | F (1, 18) = 0.3863<br>P=0.5421    | ASec | 0.9341  |
|                     |                  |                                   | CSec | 0.5013  |
|                     |                  |                                   | PSec | 0.9866  |
| Figure 5_fig. sup3H | Two-way ANOVA    | F (1, 18) = 0.606<br>P=0.4464     | ASec | 0.9635  |
|                     |                  |                                   | CSec | 0.7735  |
|                     |                  |                                   | PSec | >0.9999 |
| Figure 5_fig. sup3I | Two-way ANOVA    | F (1, 18) = 1.023<br>P=0.3252     | ASec | 0.9996  |
|                     |                  |                                   | CSec | 0.5641  |
|                     |                  |                                   | PSec | 0.8993  |
| Figure 5_fig. sup3J | Two-way ANOVA    | F (1, 18) = 1.542<br>P=0.2302     | ASec | 0.9924  |
|                     |                  |                                   | CSec | 0.3247  |
|                     |                  |                                   | PSec | 0.8277  |
| Figure 5_fig. sup3K | Two-way ANOVA    | F (1, 18) = 2.484<br>P=0.1325     | ASec | 0.9970  |
|                     |                  |                                   | CSec | 0.2938  |
|                     |                  |                                   | PSec | 0.5515  |
| Figure 5_fig. sup3M | Student's t-test | t(4)=8.283 P=0.0012               | N/A  |         |

|                        |                     |                                  |     |
|------------------------|---------------------|----------------------------------|-----|
| Figure 6_fig.<br>sup1C | Student's<br>t-test | $t(155)=12.64$ $P=0.0001$        | N/A |
| Figure7_fig.<br>sup1A  | Student's<br>t-test | $t(4)=0.2472$ $P=0.8169$         | N/A |
| Figure7_fig.<br>sup1B  | Student's<br>t-test | $t(4)=2.048$ $P=0.11$            | N/A |
| Figure7_fig.<br>sup2D  | Two-way<br>ANOVA    | $F(1, 84) = 1.62$<br>$P=0.2067$  |     |
| Figure7_fig.<br>sup2E  | Student's<br>t-test | $t(4)=1.248$ $P=0.2802$          | N/A |
| Figure7_fig.<br>sup2I  | Student's<br>t-test | $t(4)=0.3694$ $P=0.7306$         | N/A |
| Figure7_fig.<br>sup2J  | Student's<br>t-test | $t(4)=0.2448$ $P=0.8187$         | N/A |
| Figure7_fig.<br>sup2N  | Two-way<br>ANOVA    | $F(1, 105) = 6.27$<br>$P=0.0138$ |     |
| Figure7_fig.<br>sup2O  | Student's<br>t-test | $t(5)=1.757$ $P=0.1393$          | N/A |
| Figure7_fig.<br>sup2T  | Student's<br>t-test | $t(5)=0.08553$ $P=0.9352$        | N/A |
| Figure7_fig.<br>sup2U  | Student's<br>t-test | $t(5)=1.177$ $P=0.2923$          | N/A |
