# Supplementary figures and images for: Cerebellar nuclei excitatory neurons regulate developmental scaling of presynaptic Purkinje cell number and organ growth
Source: eLife journal article supplement (doi:10.7554/elife.50617), 2019-11-19

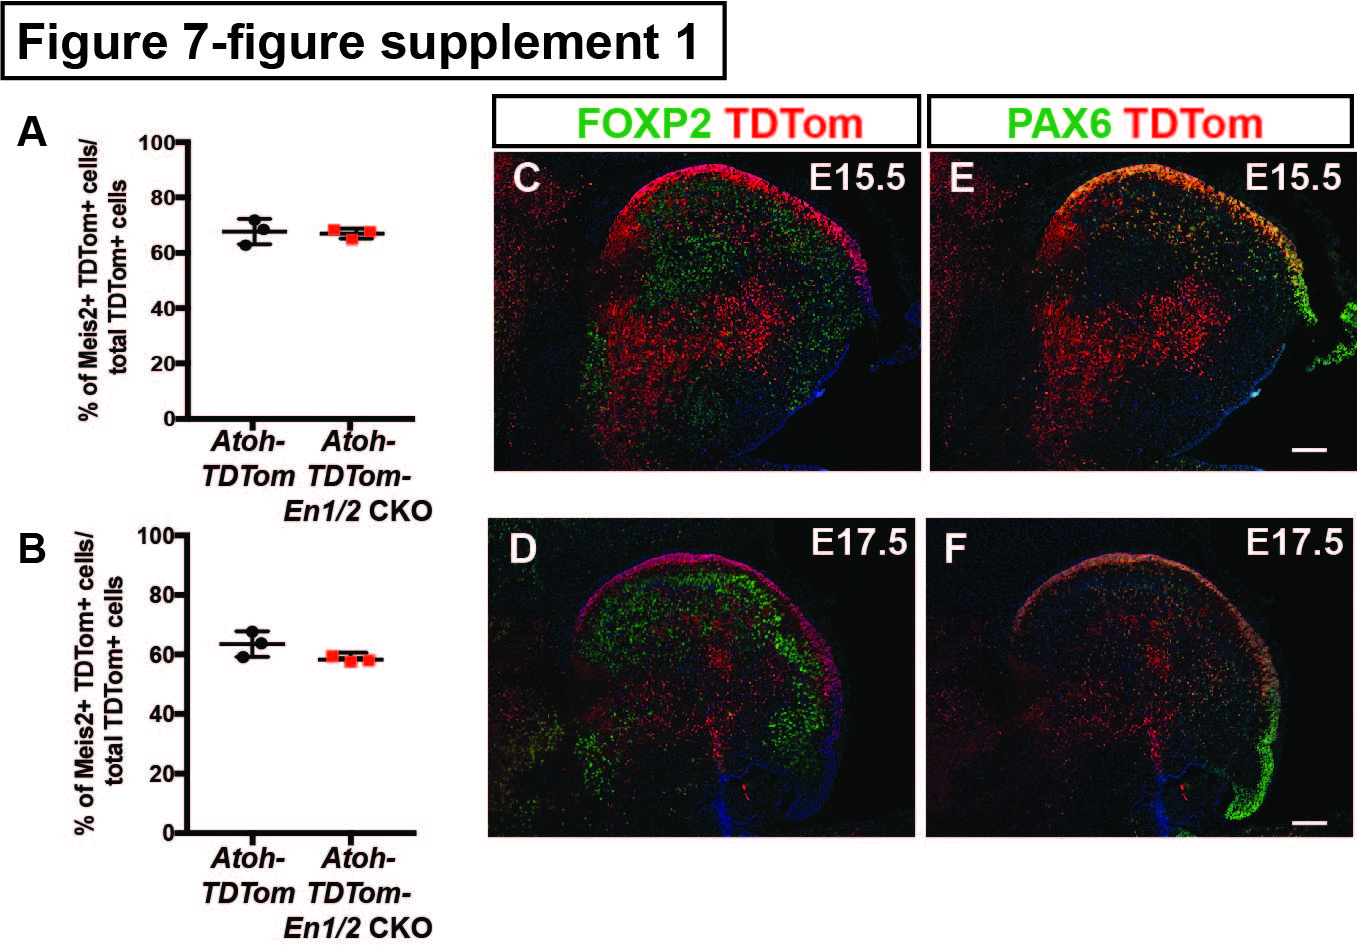

Supplement: supp [file elife-50617-supp-v1.zip › elife_poa_e50617_Figure_7_figure_supplement_1.jpg]

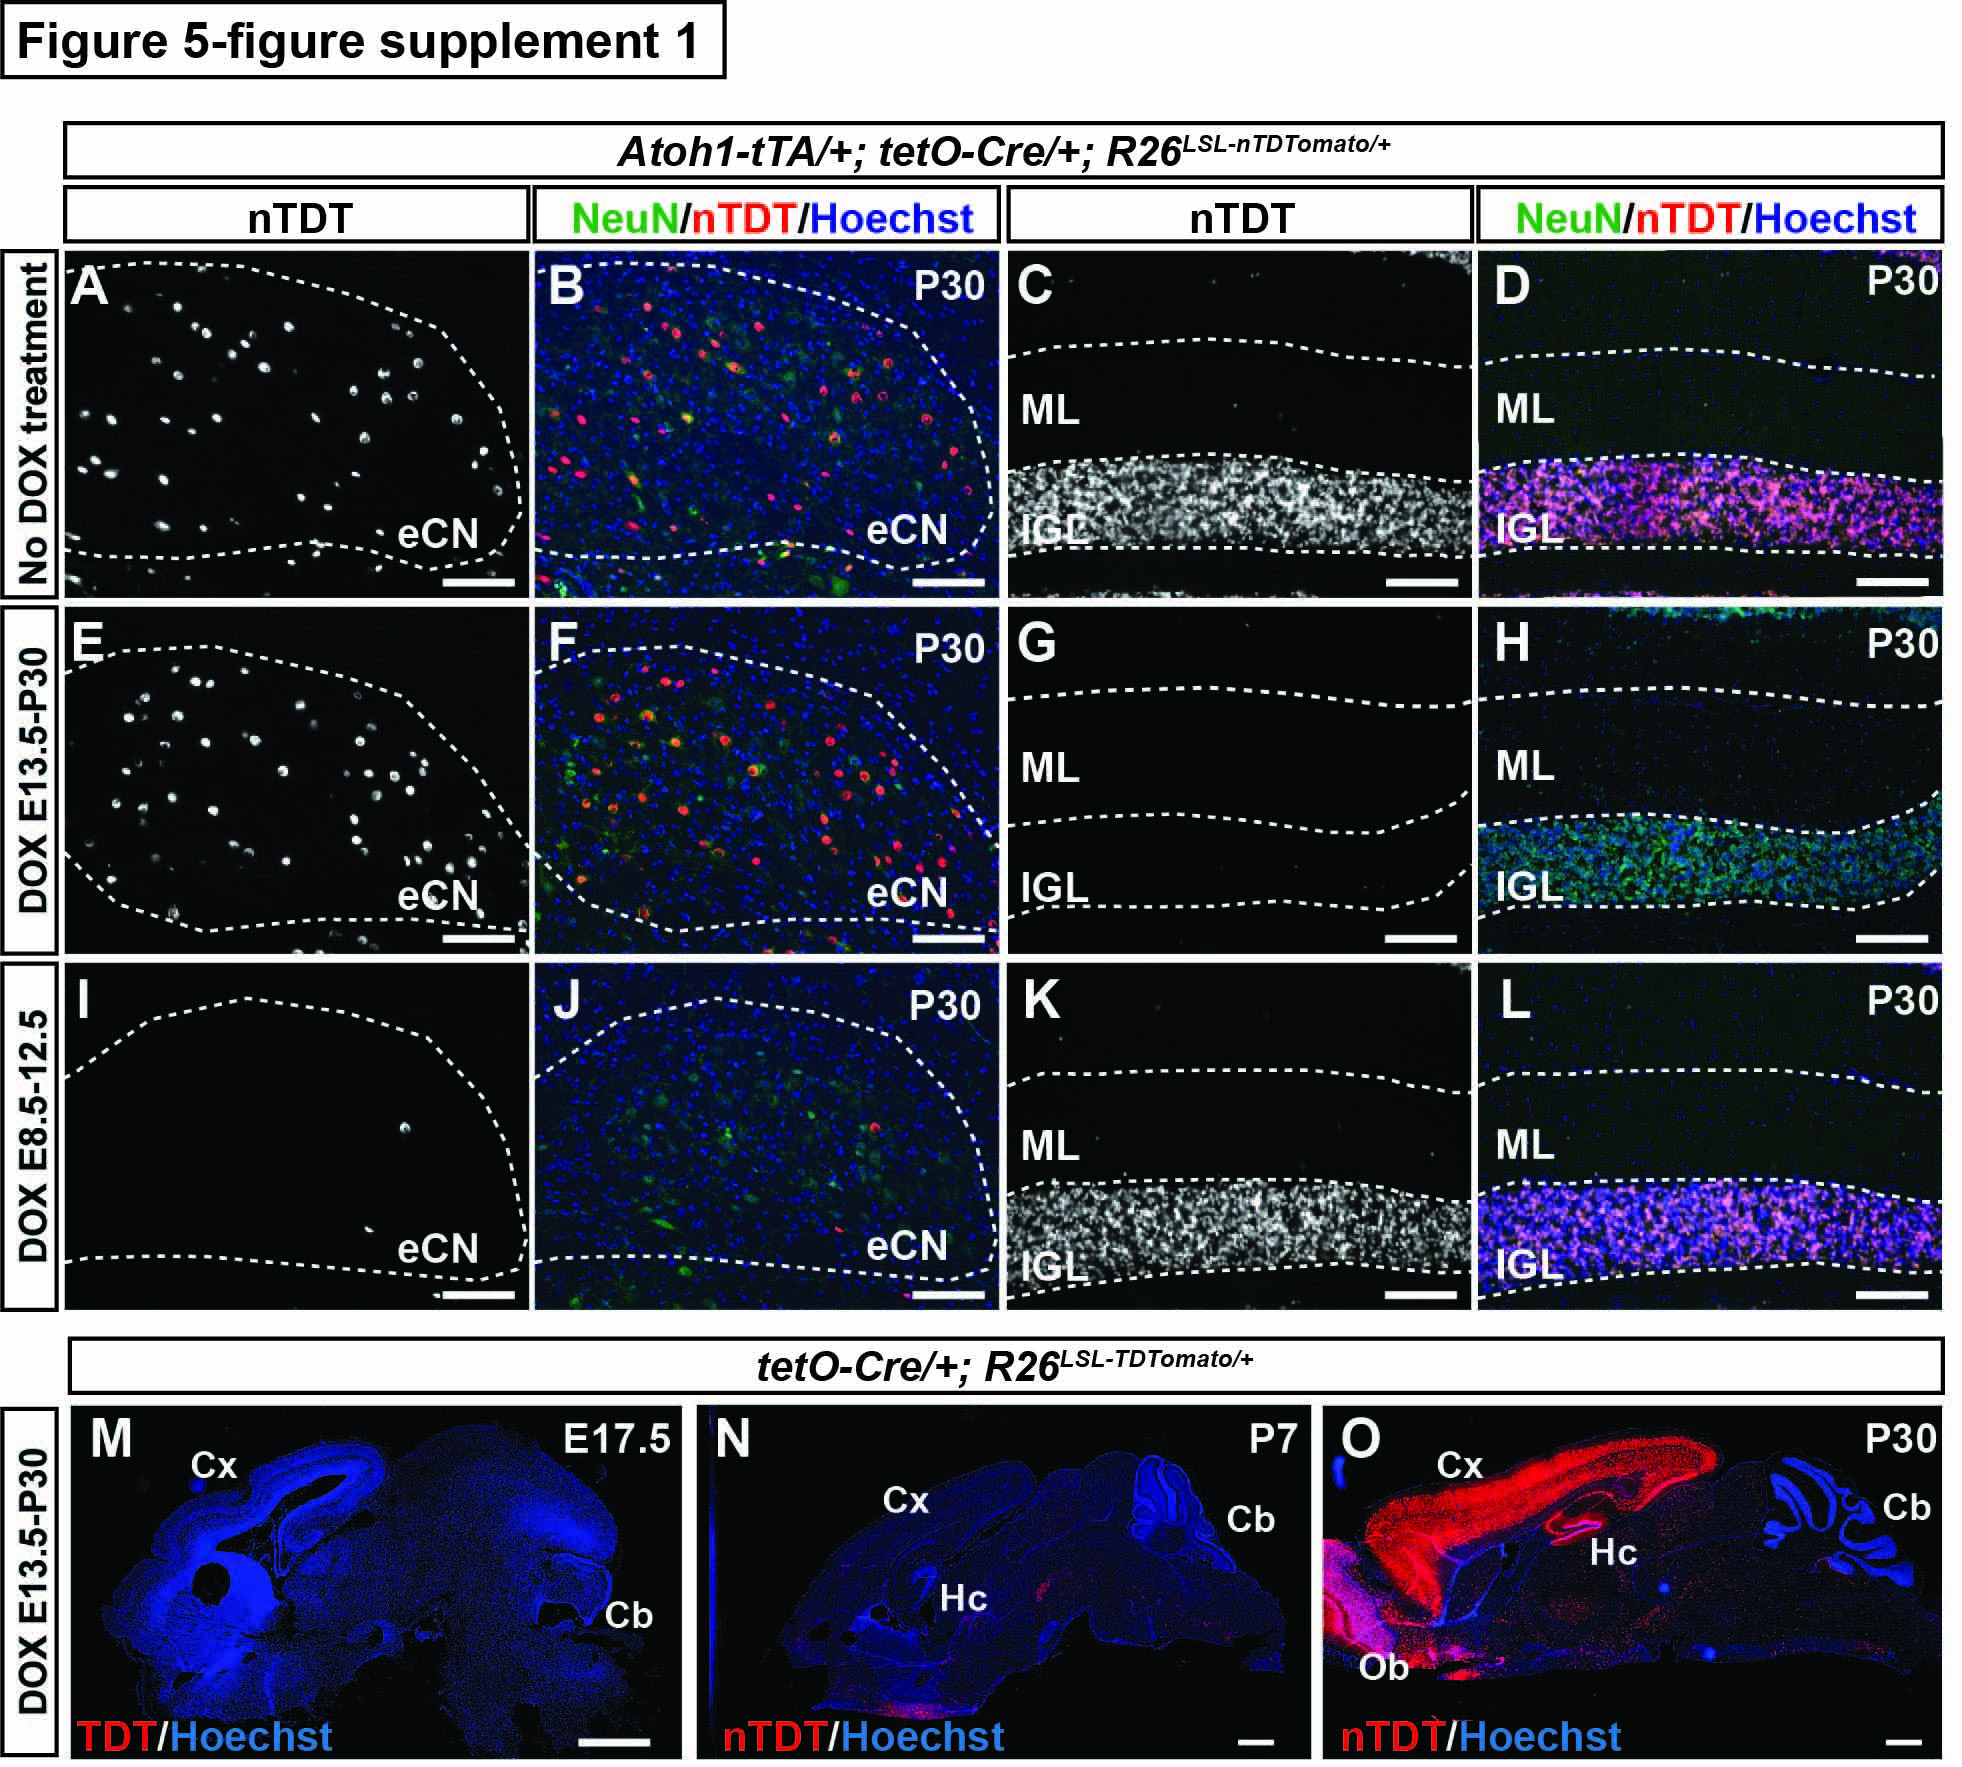

Supplement: supp [file elife-50617-supp-v1.zip › elife_poa_e50617_Figure_5_figure_supplement_1.jpg]

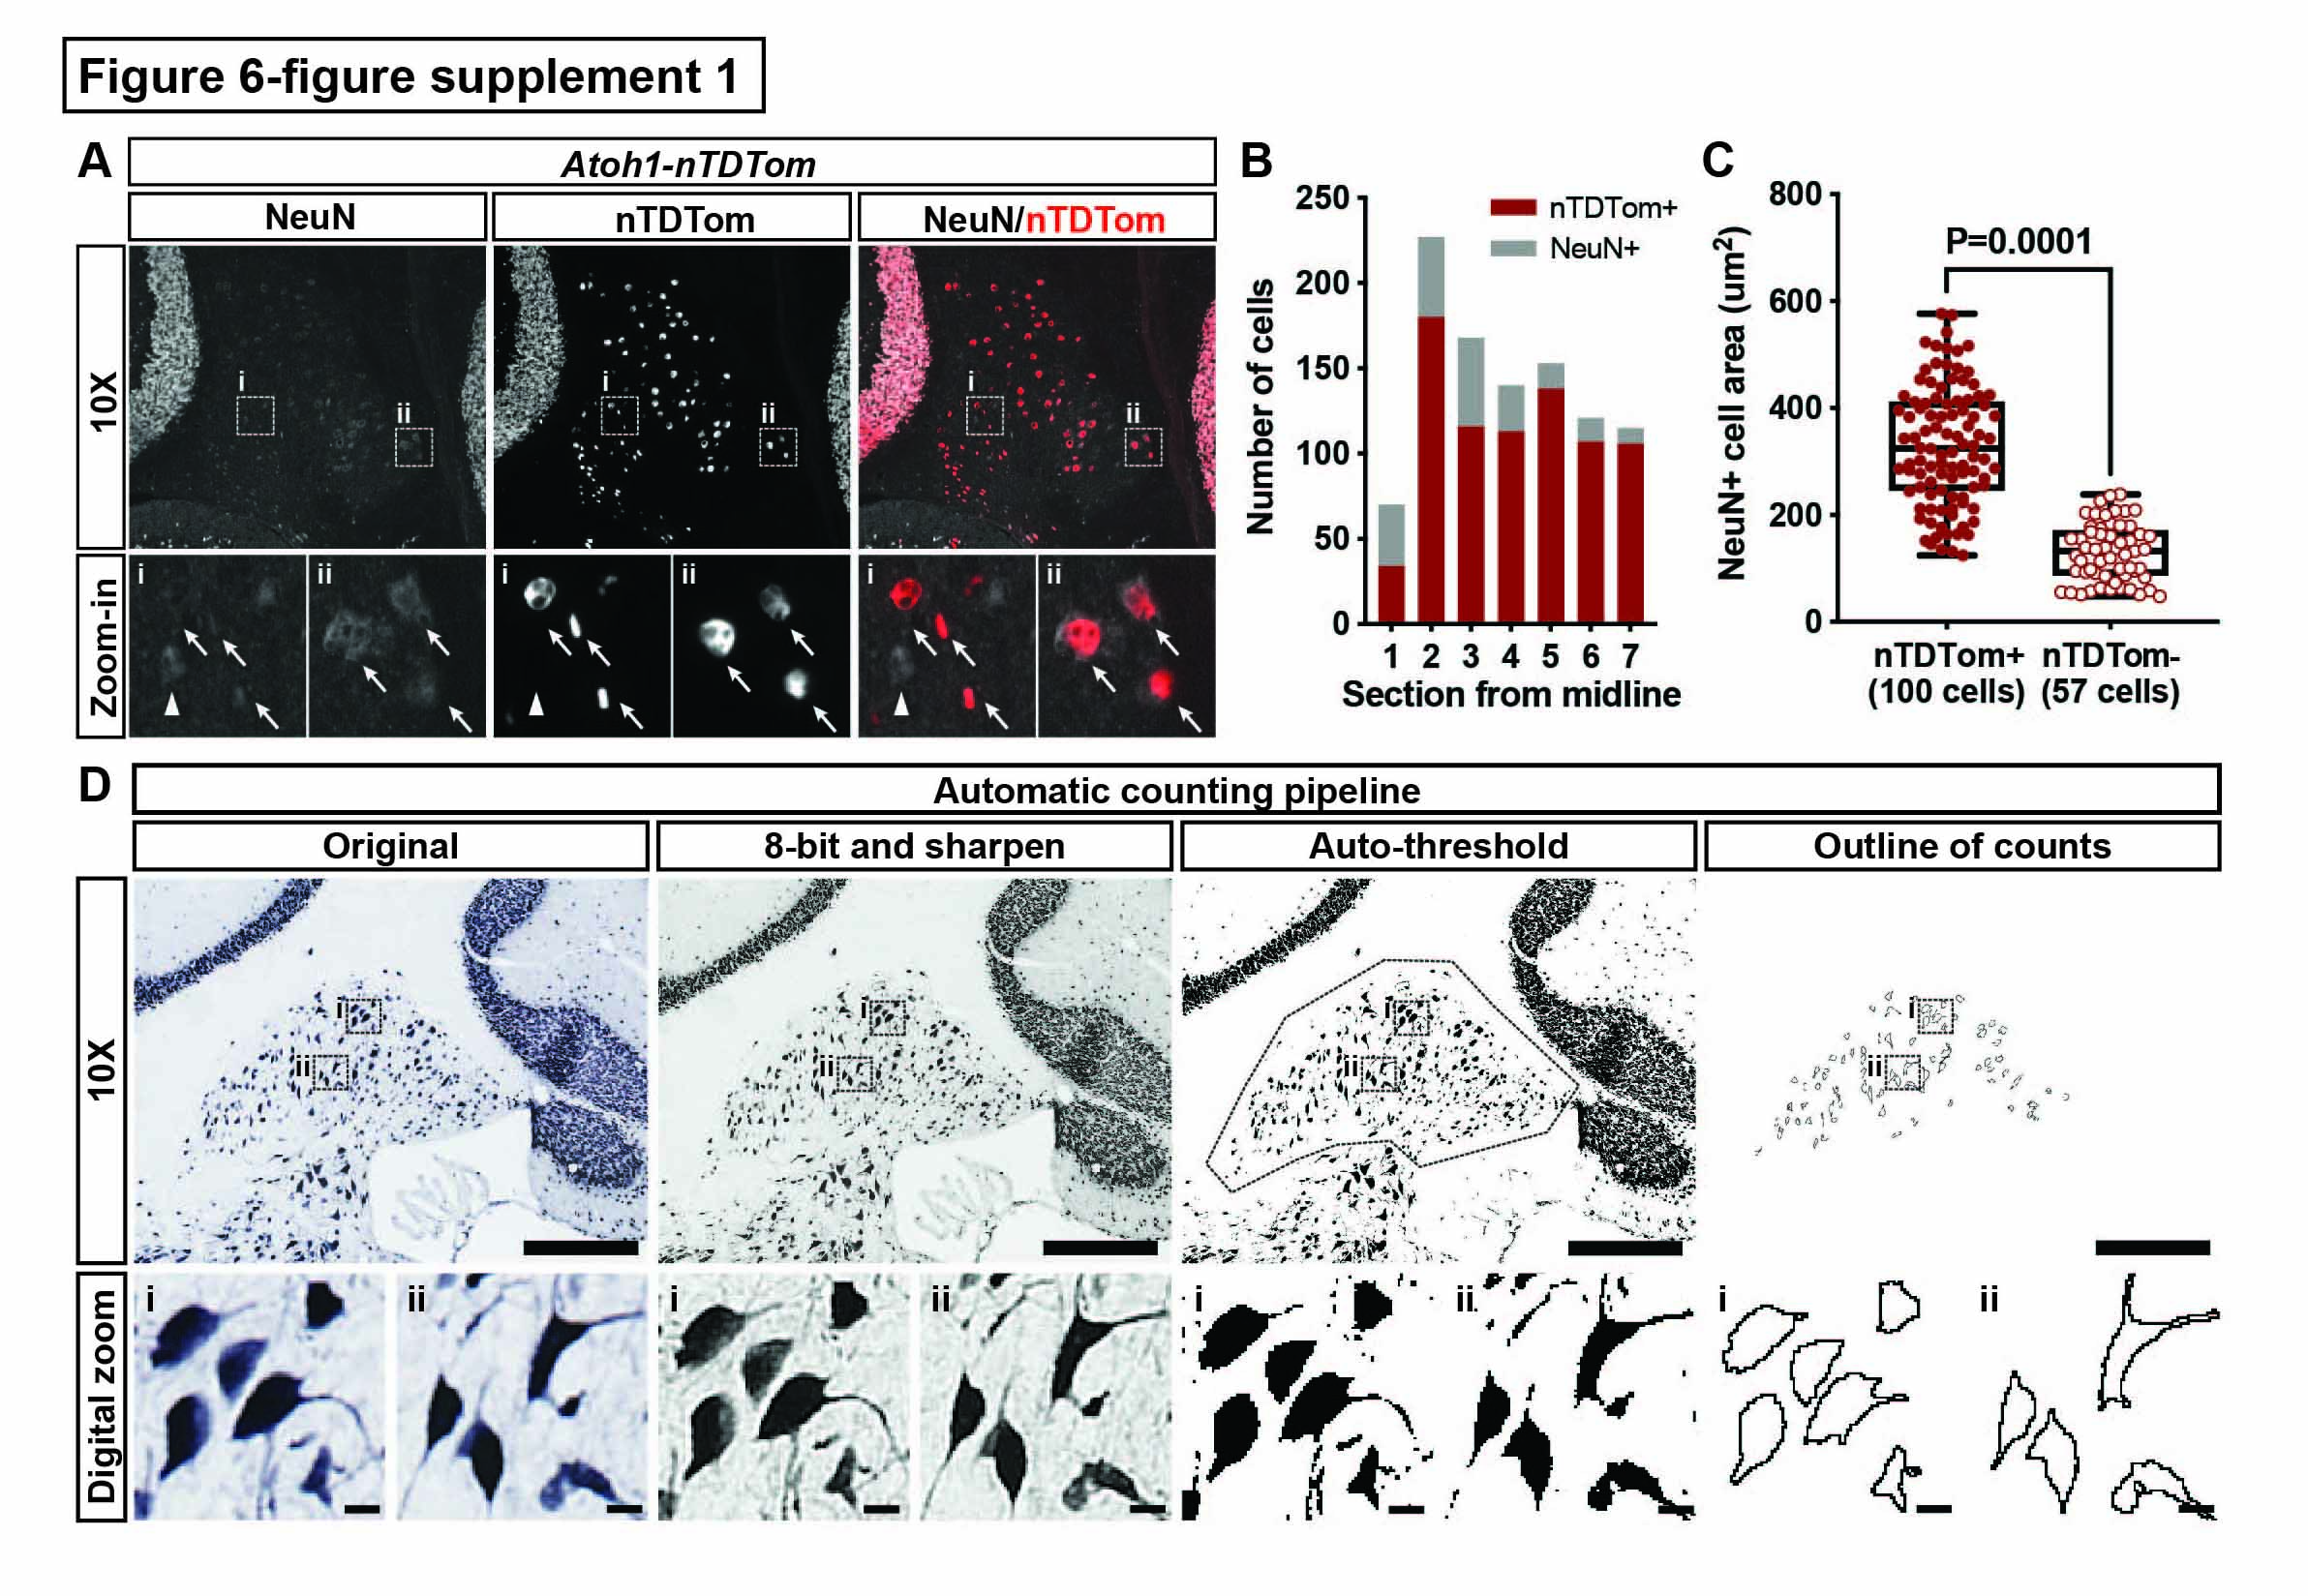

Supplement: supp [file elife-50617-supp-v1.zip › elife_poa_e50617_Figure_6_figure_supplement_1.jpg]

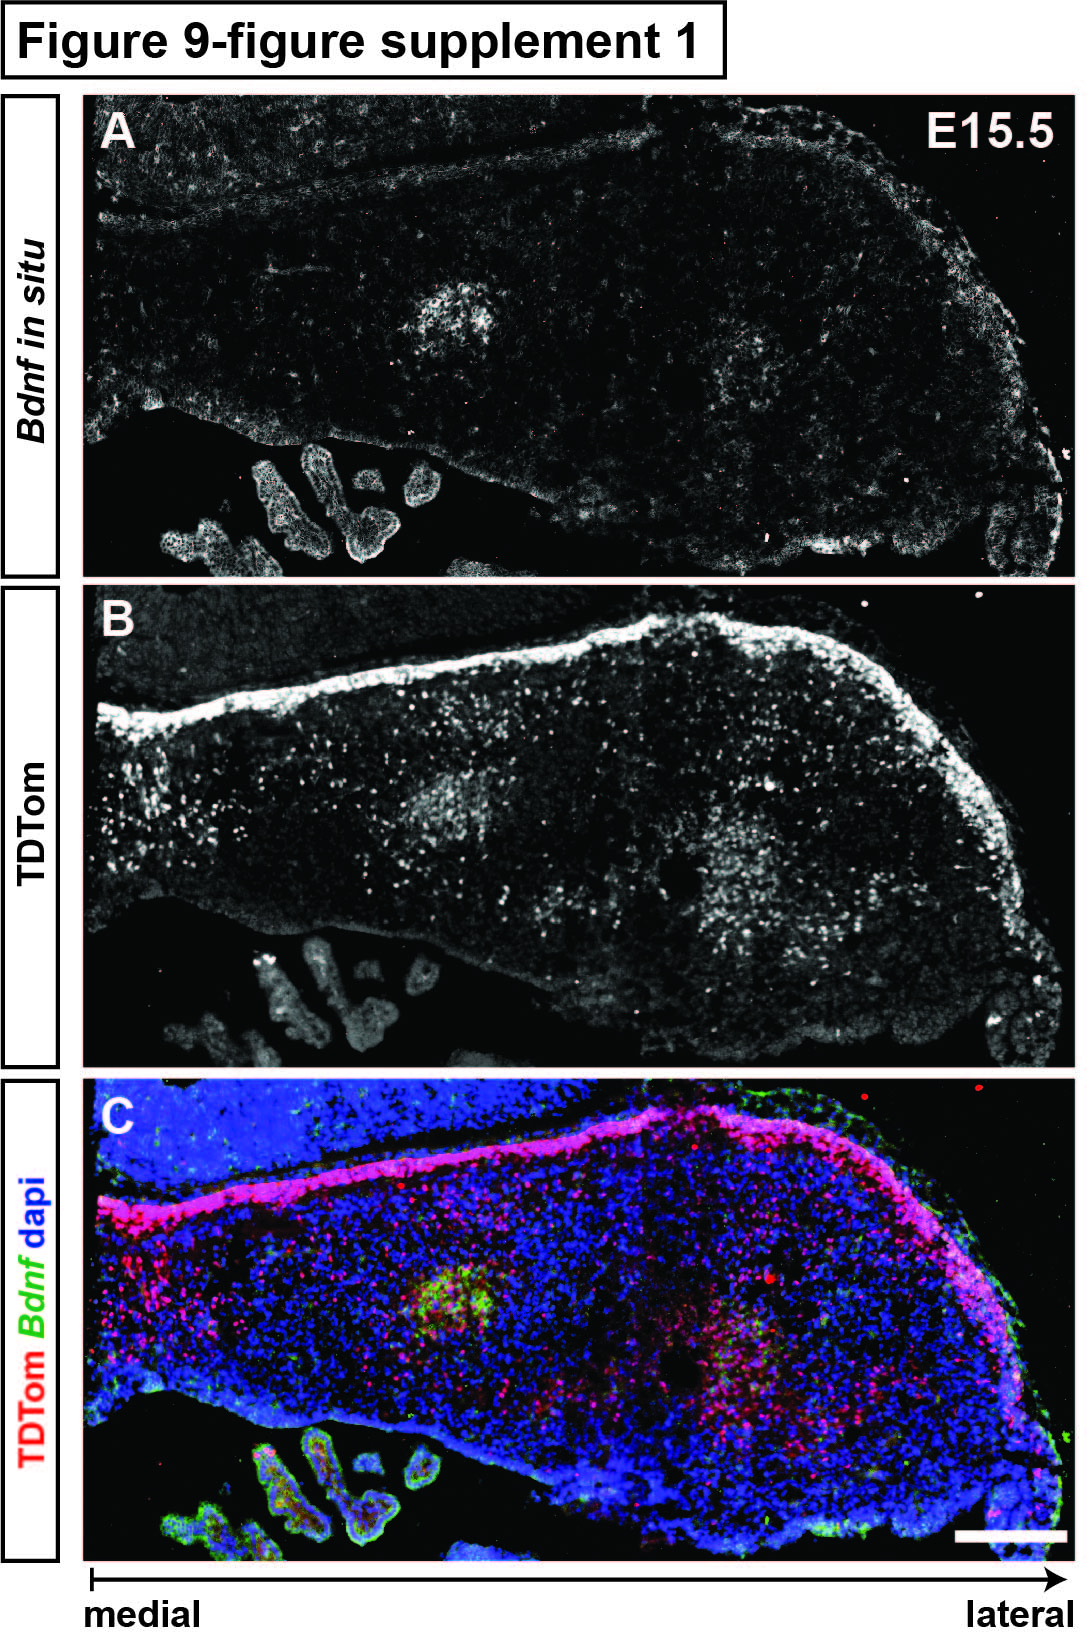

Supplement: supp [file elife-50617-supp-v1.zip › elife_poa_e50617_Figure_9_figure_supplement_1.jpg]

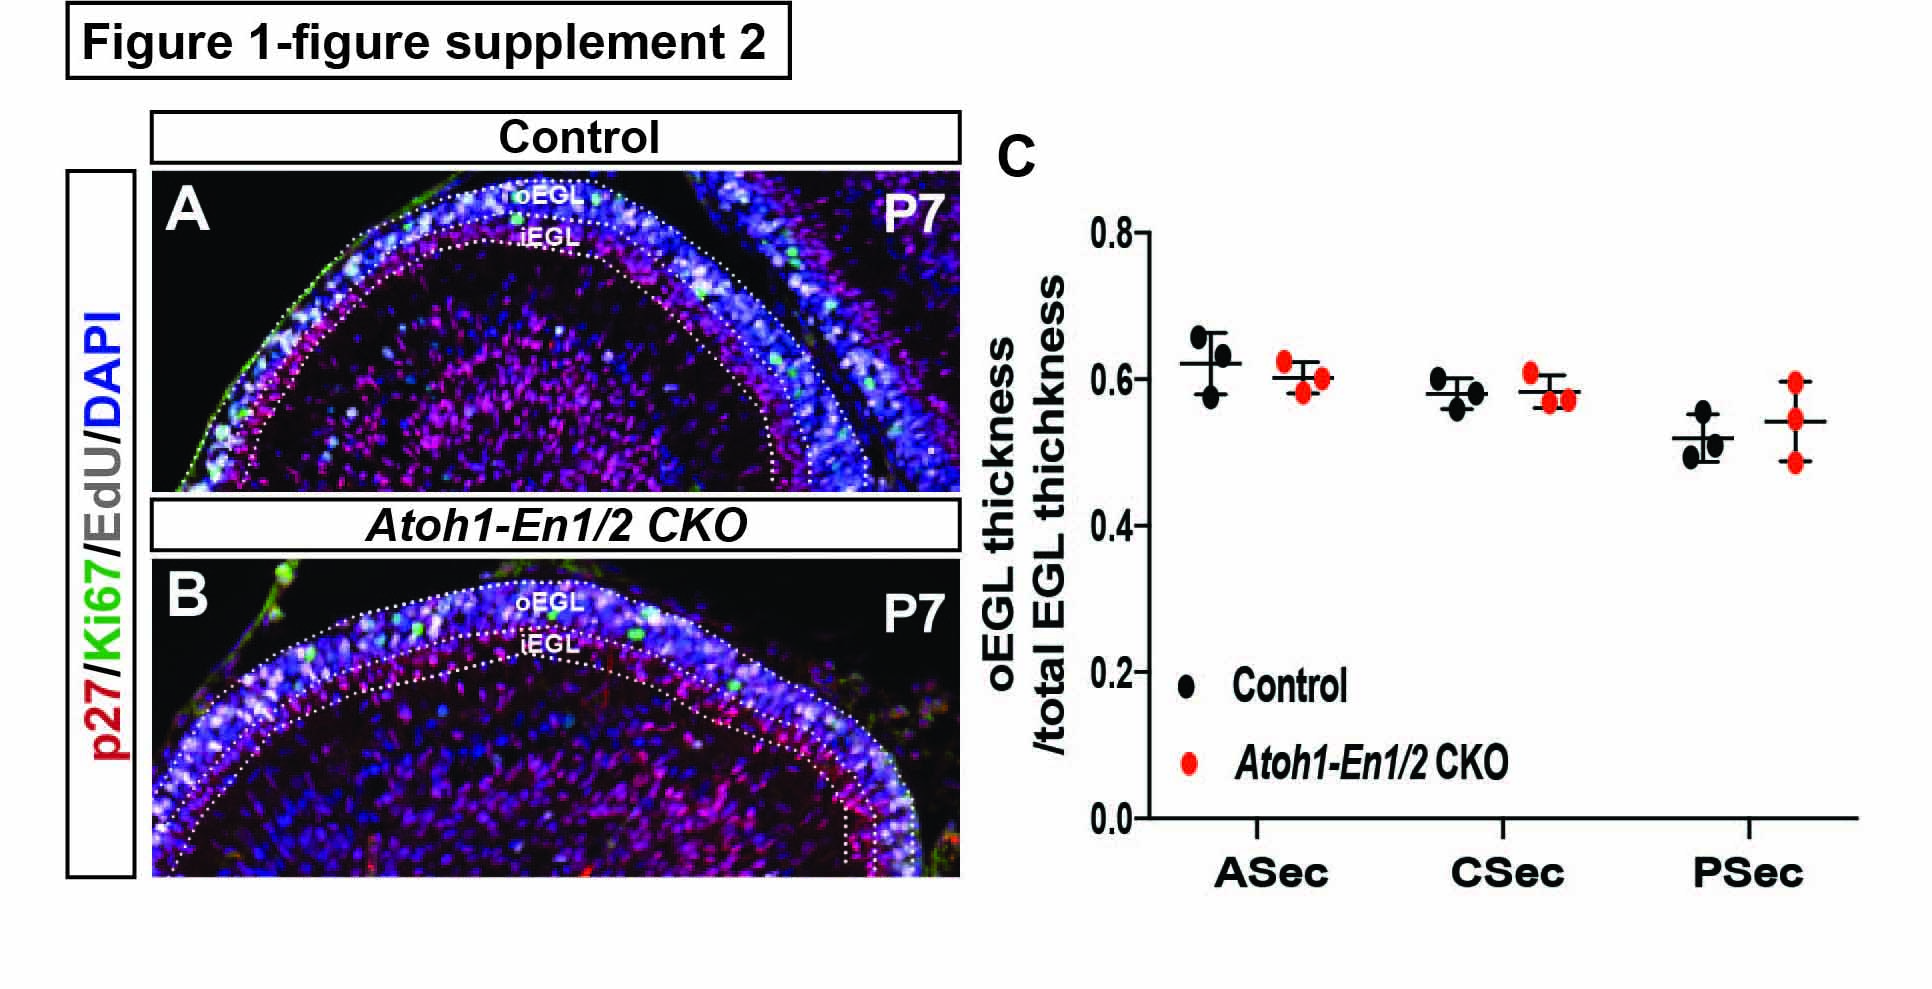

Supplement: supp [file elife-50617-supp-v1.zip › elife_poa_e50617_Figure_1_figure_supplement_2.jpg]

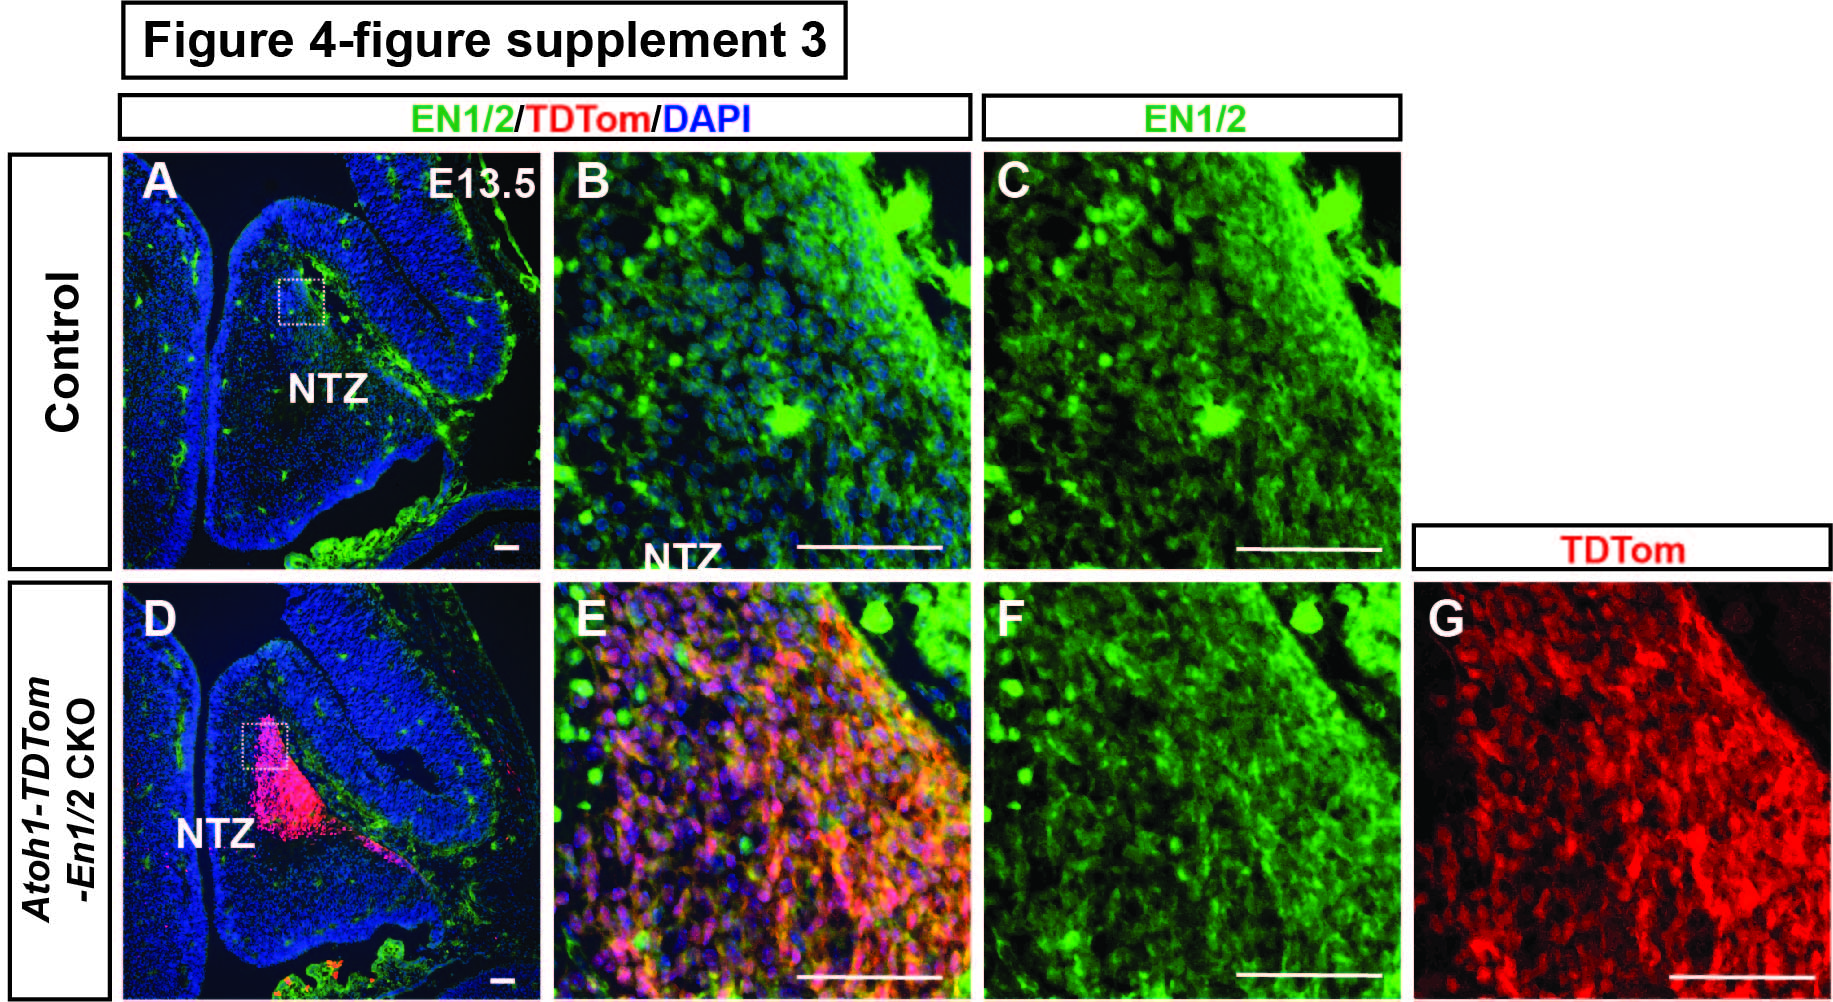

Supplement: supp [file elife-50617-supp-v1.zip › elife_poa_e50617_Figure_4_figure_supplement_3.jpg]

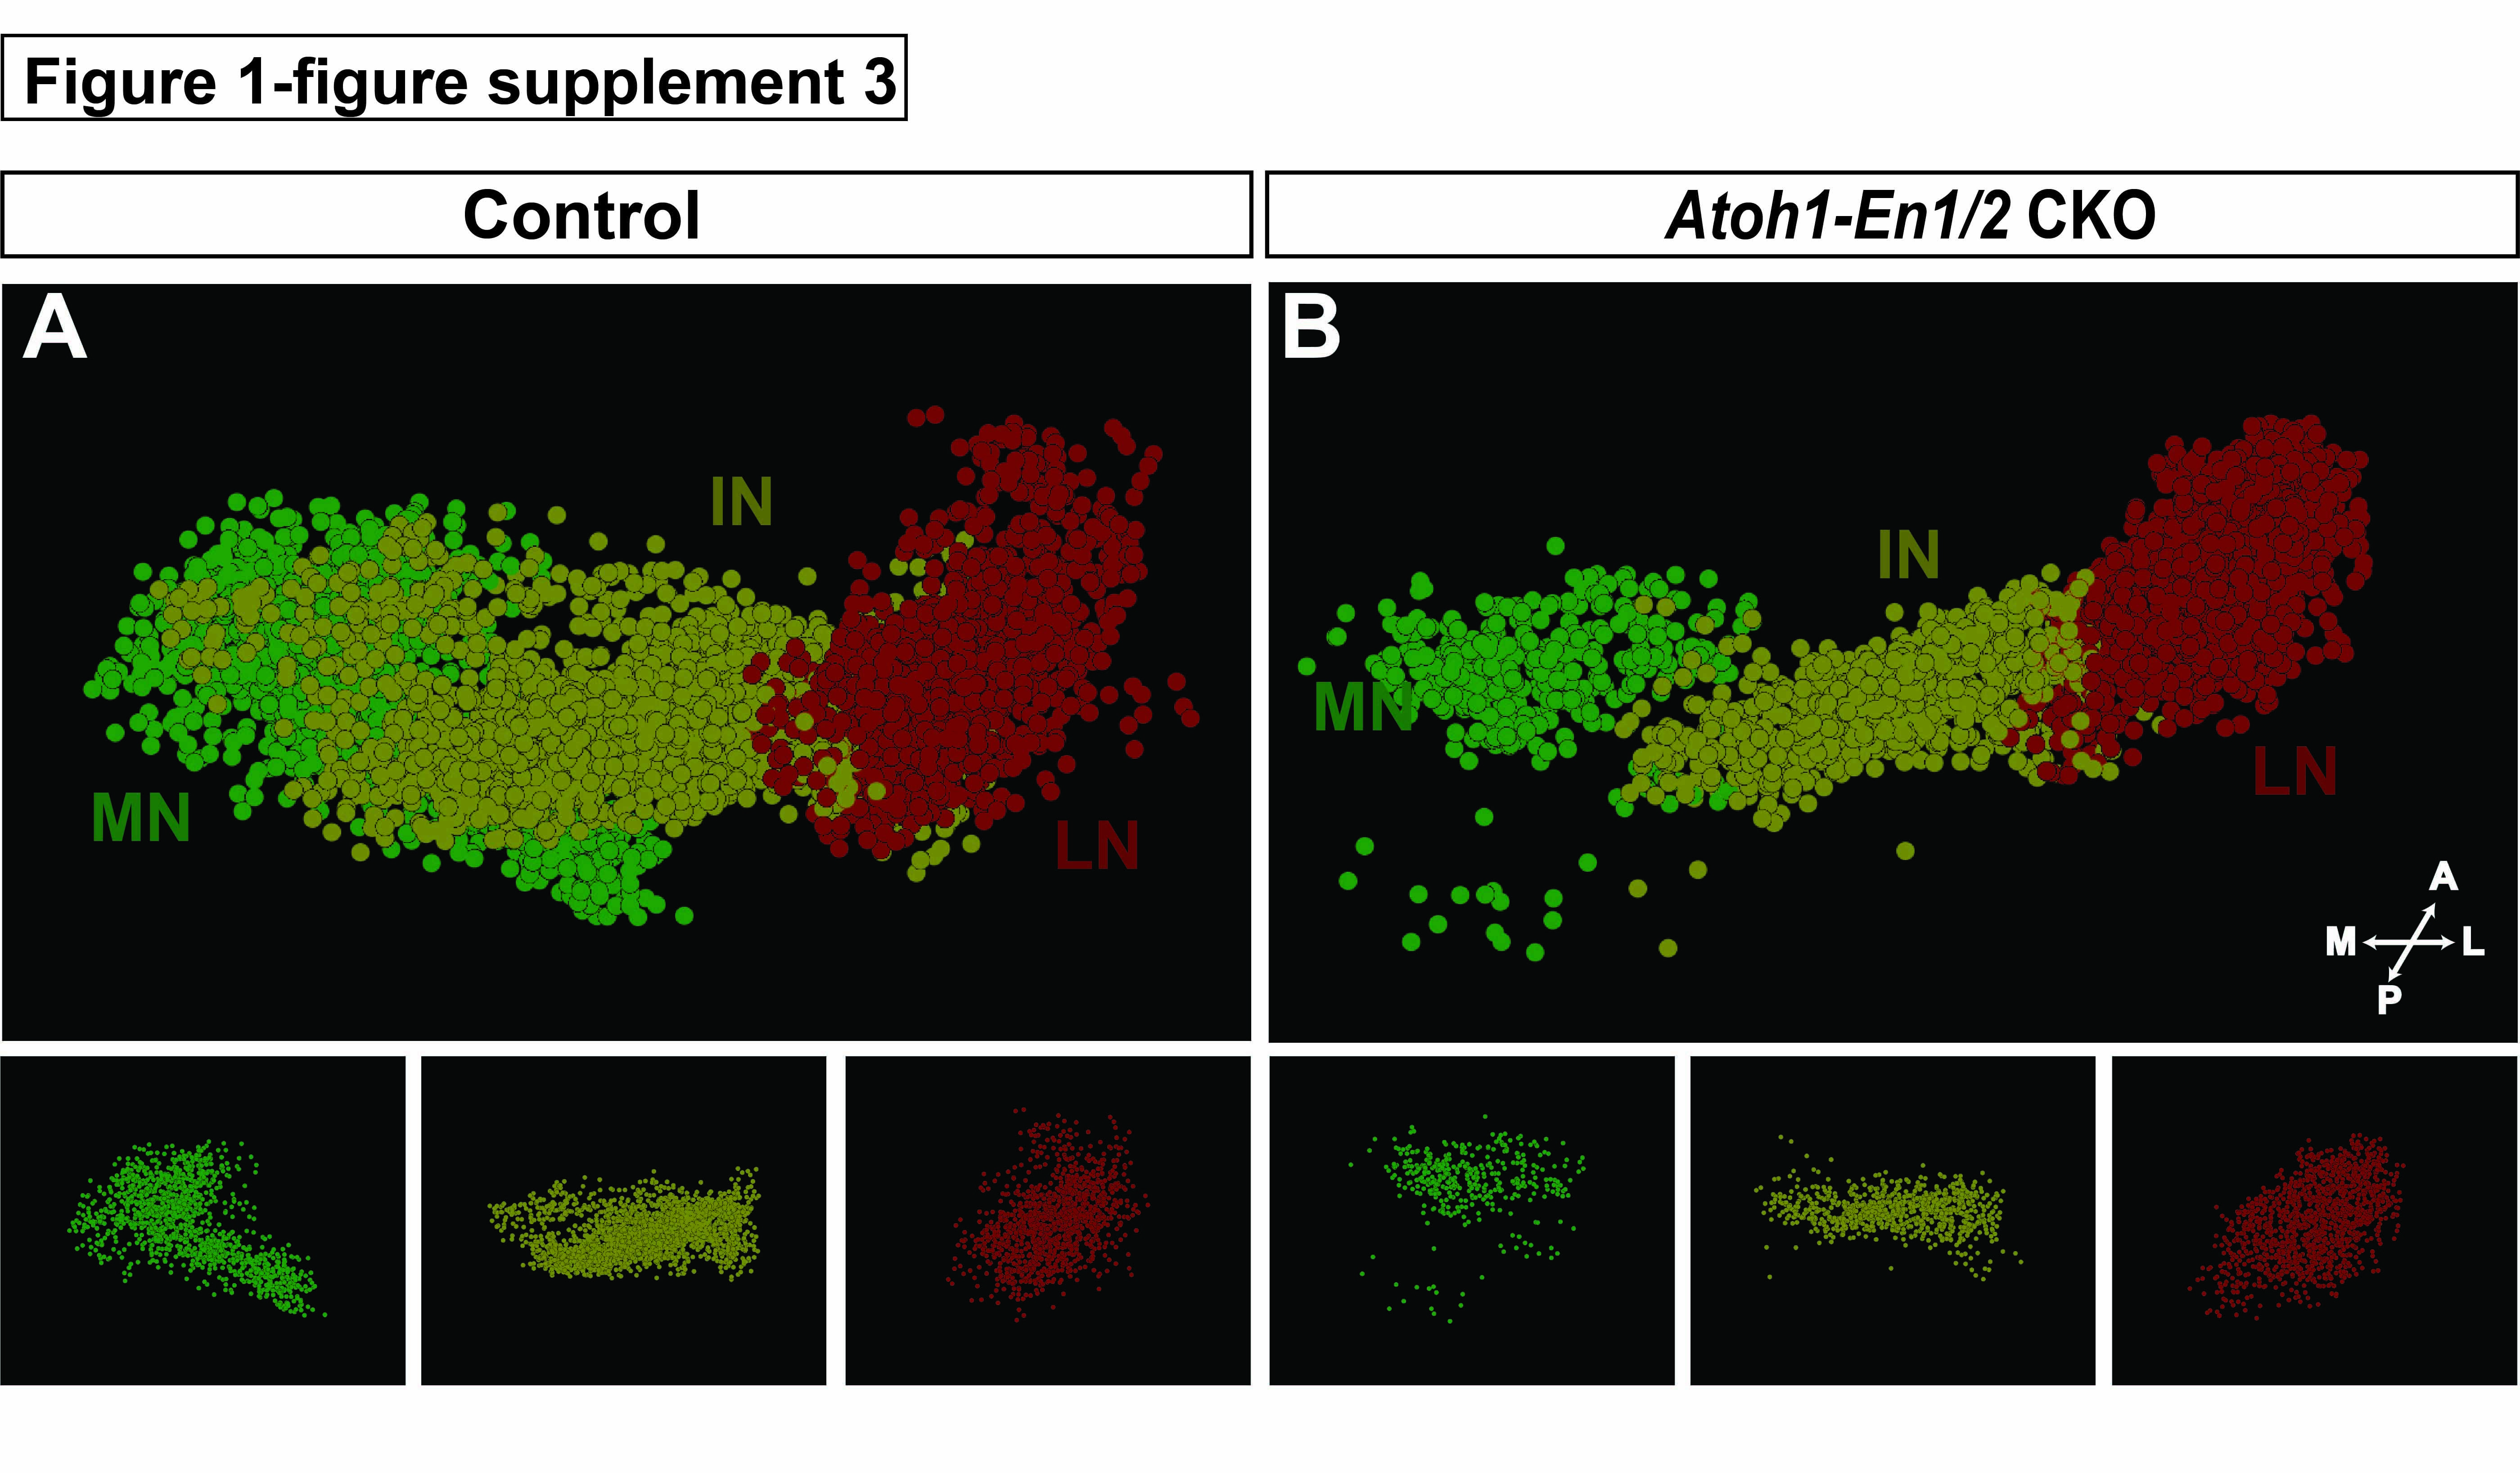

Supplement: supp [file elife-50617-supp-v1.zip › elife_poa_e50617_Figure_1_figure_supplement_3.jpg]

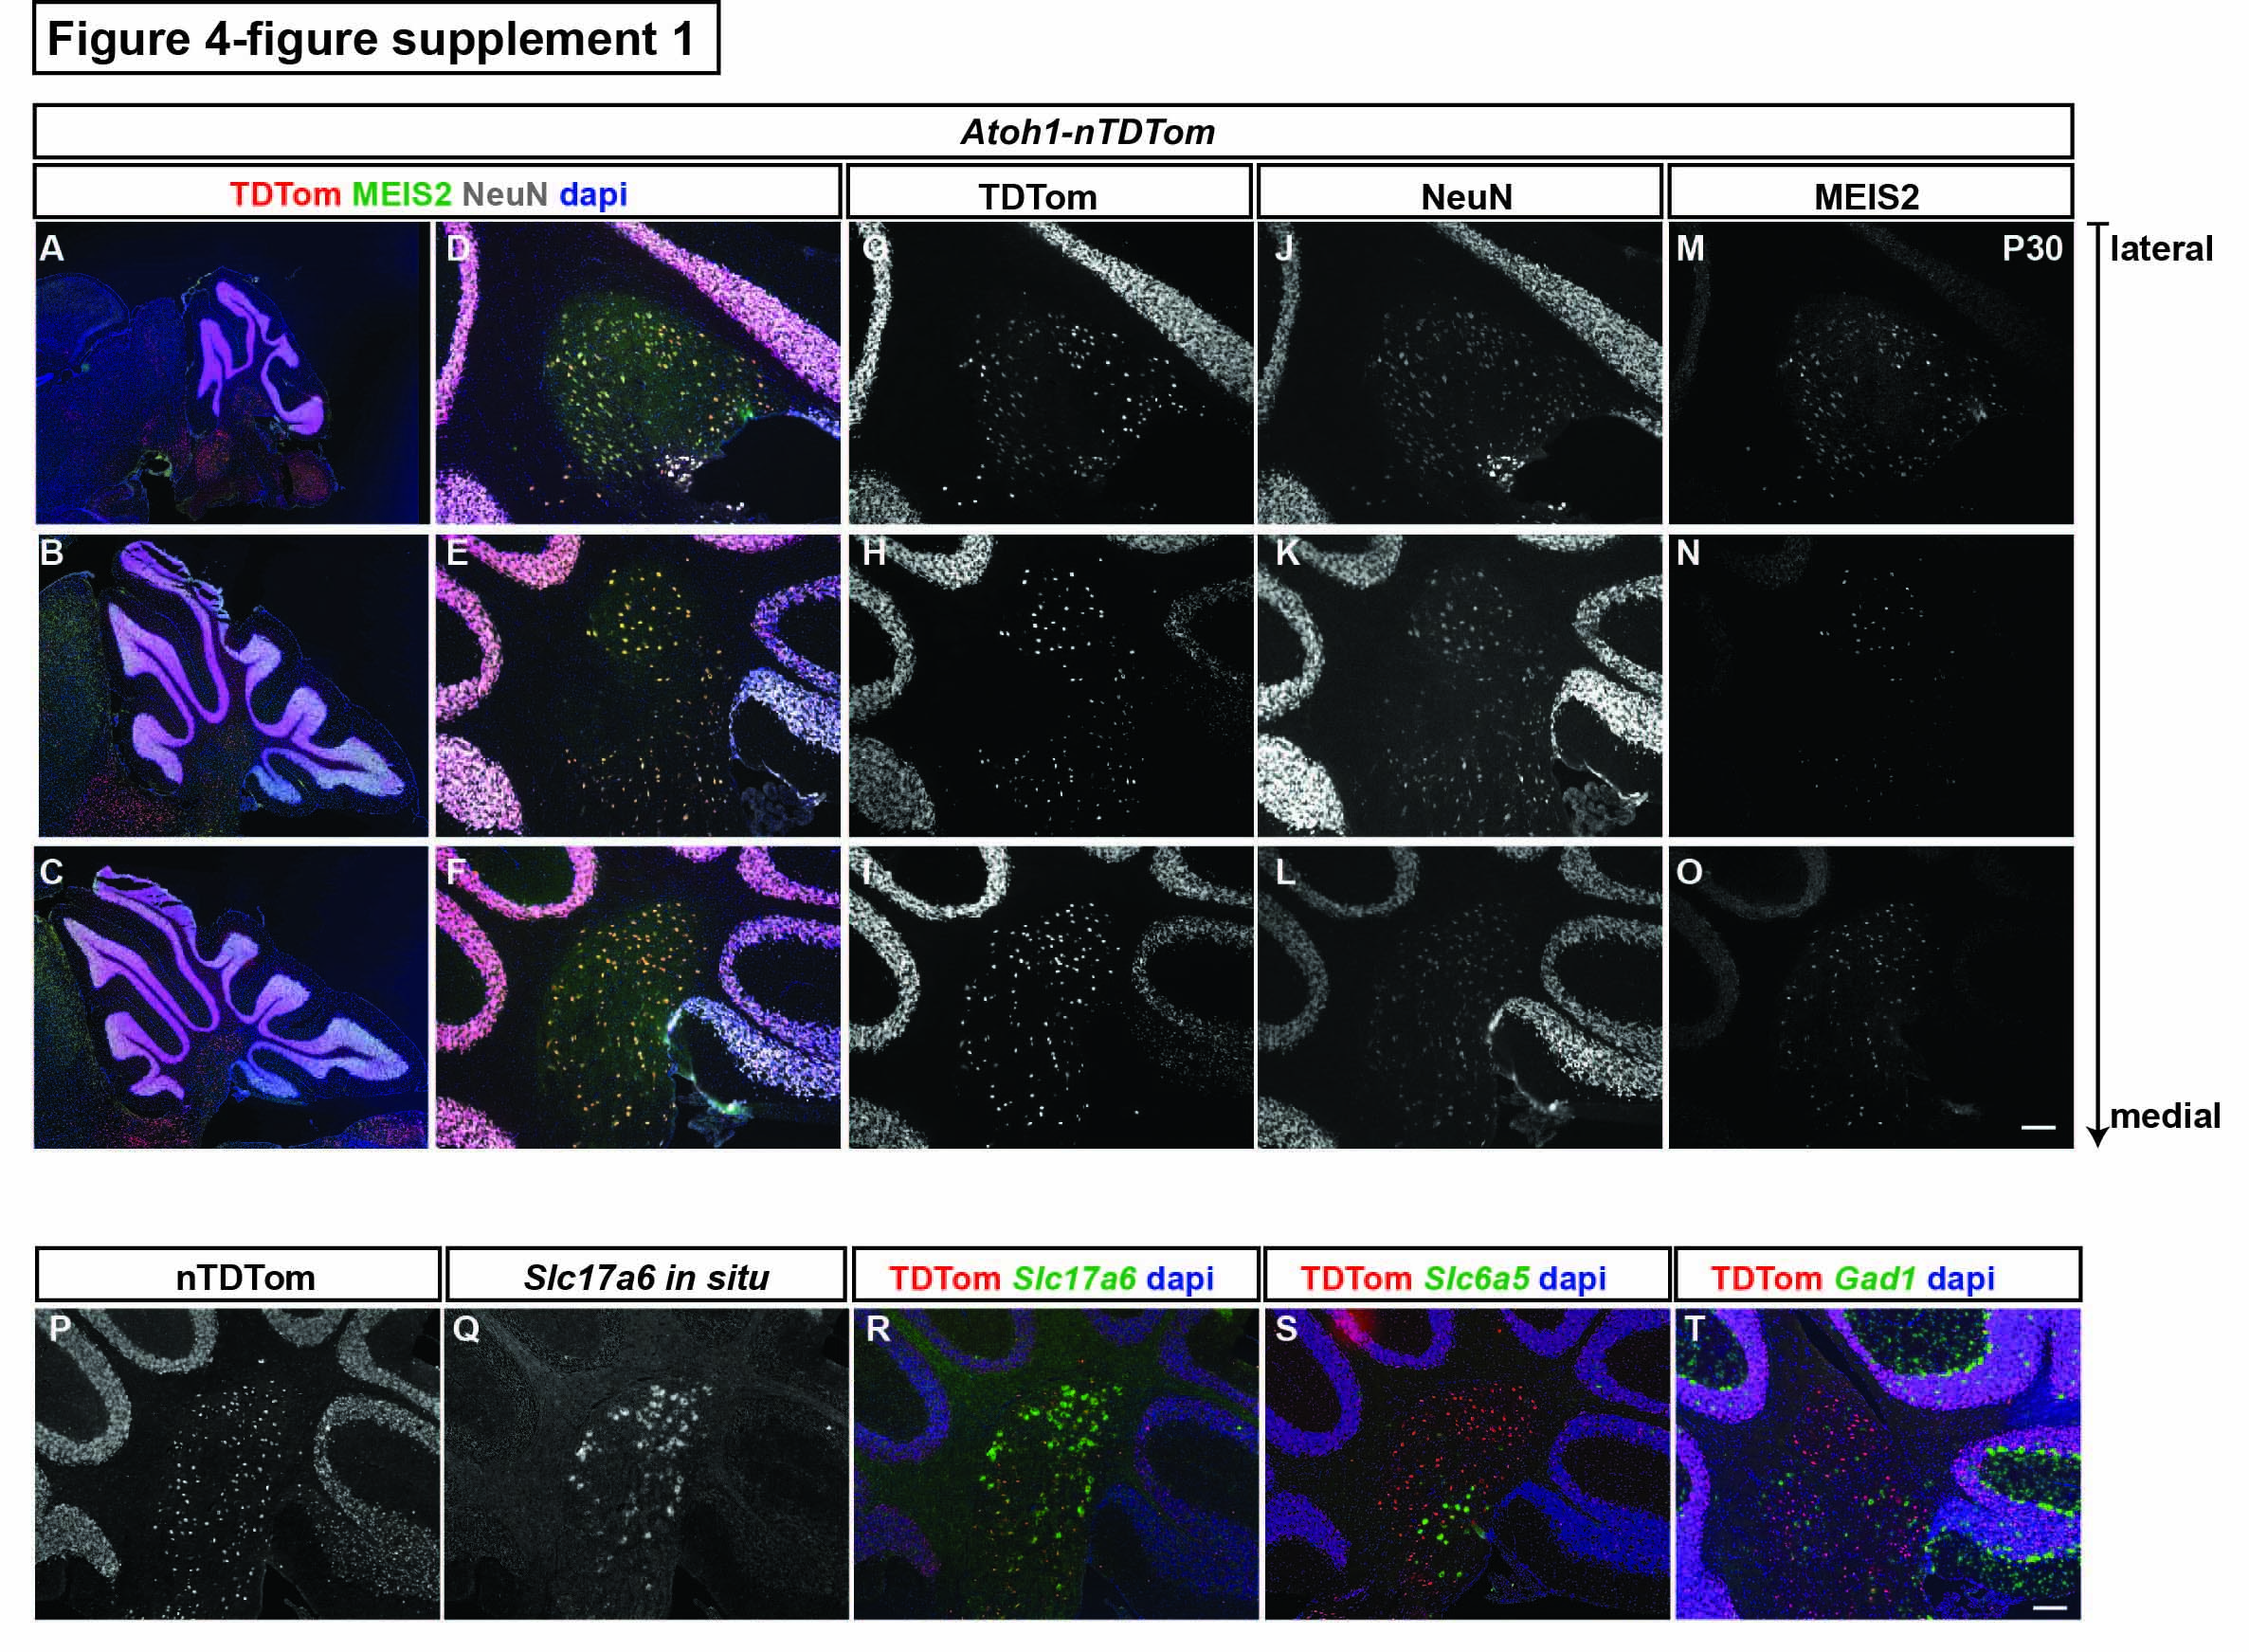

Supplement: supp [file elife-50617-supp-v1.zip › elife_poa_e50617_Figure_4_figure_supplement_1.jpg]

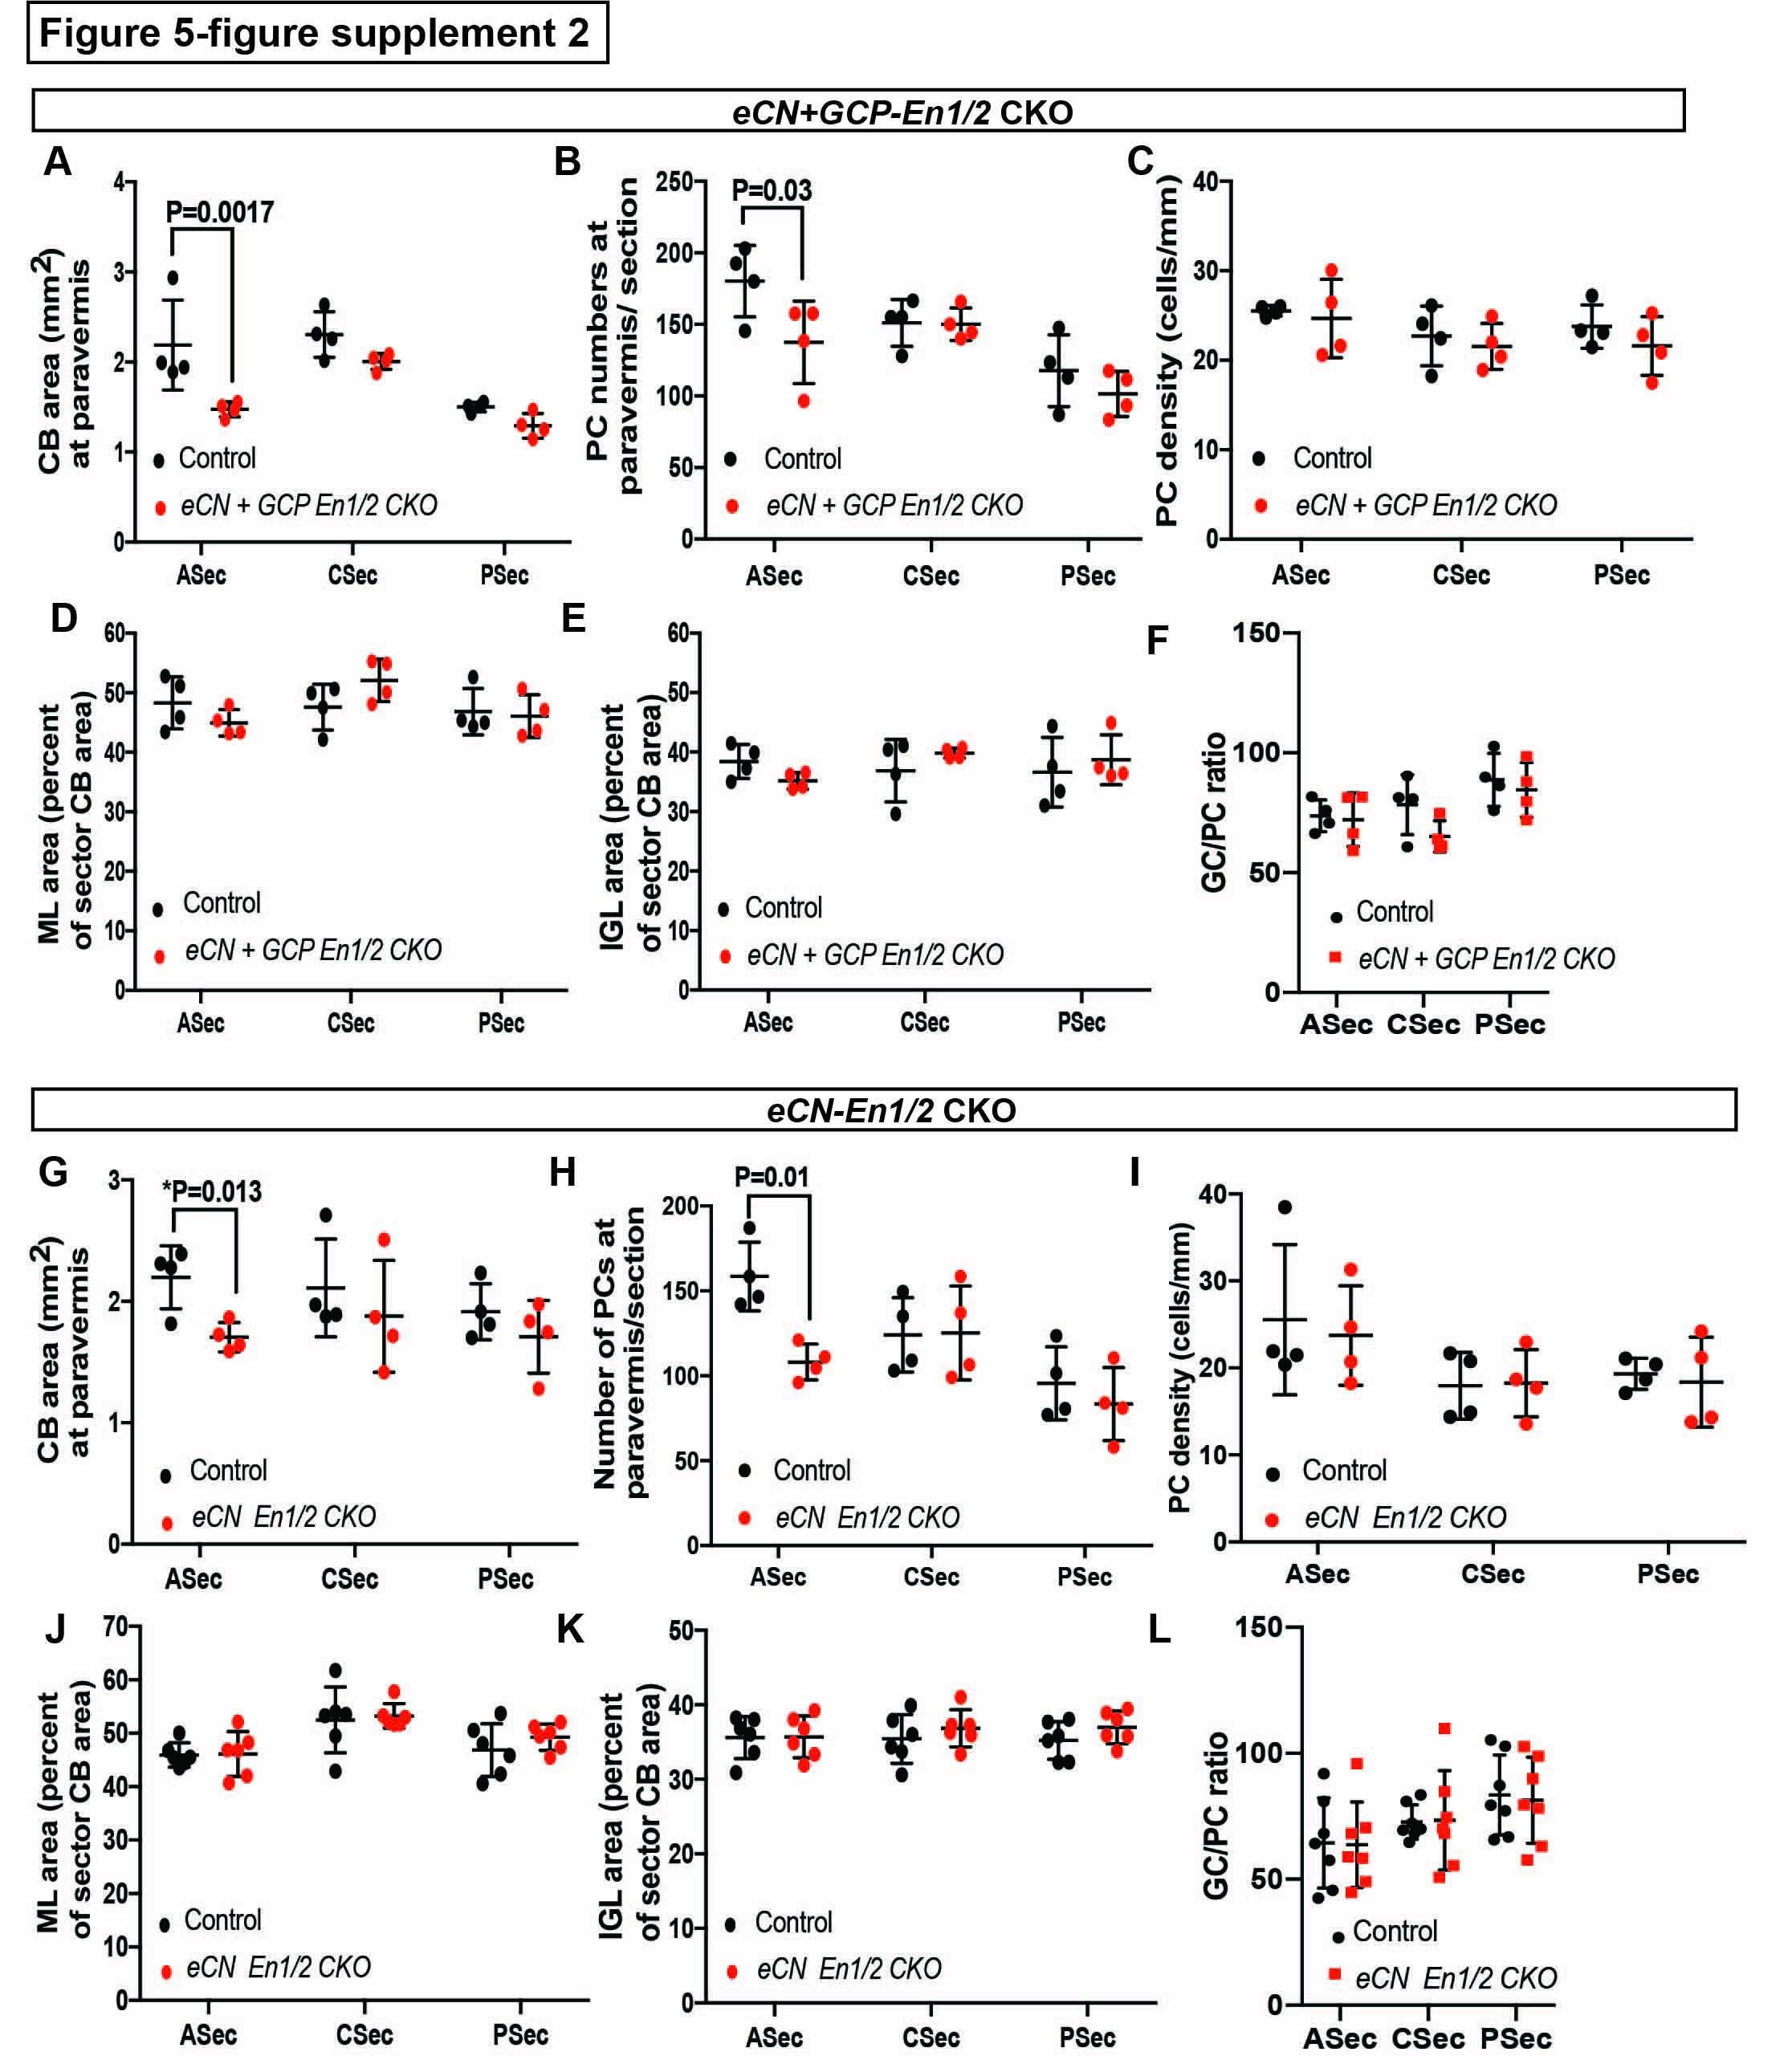

Supplement: supp [file elife-50617-supp-v1.zip › elife_poa_e50617_Figure_5_figure_supplement_2.jpg]

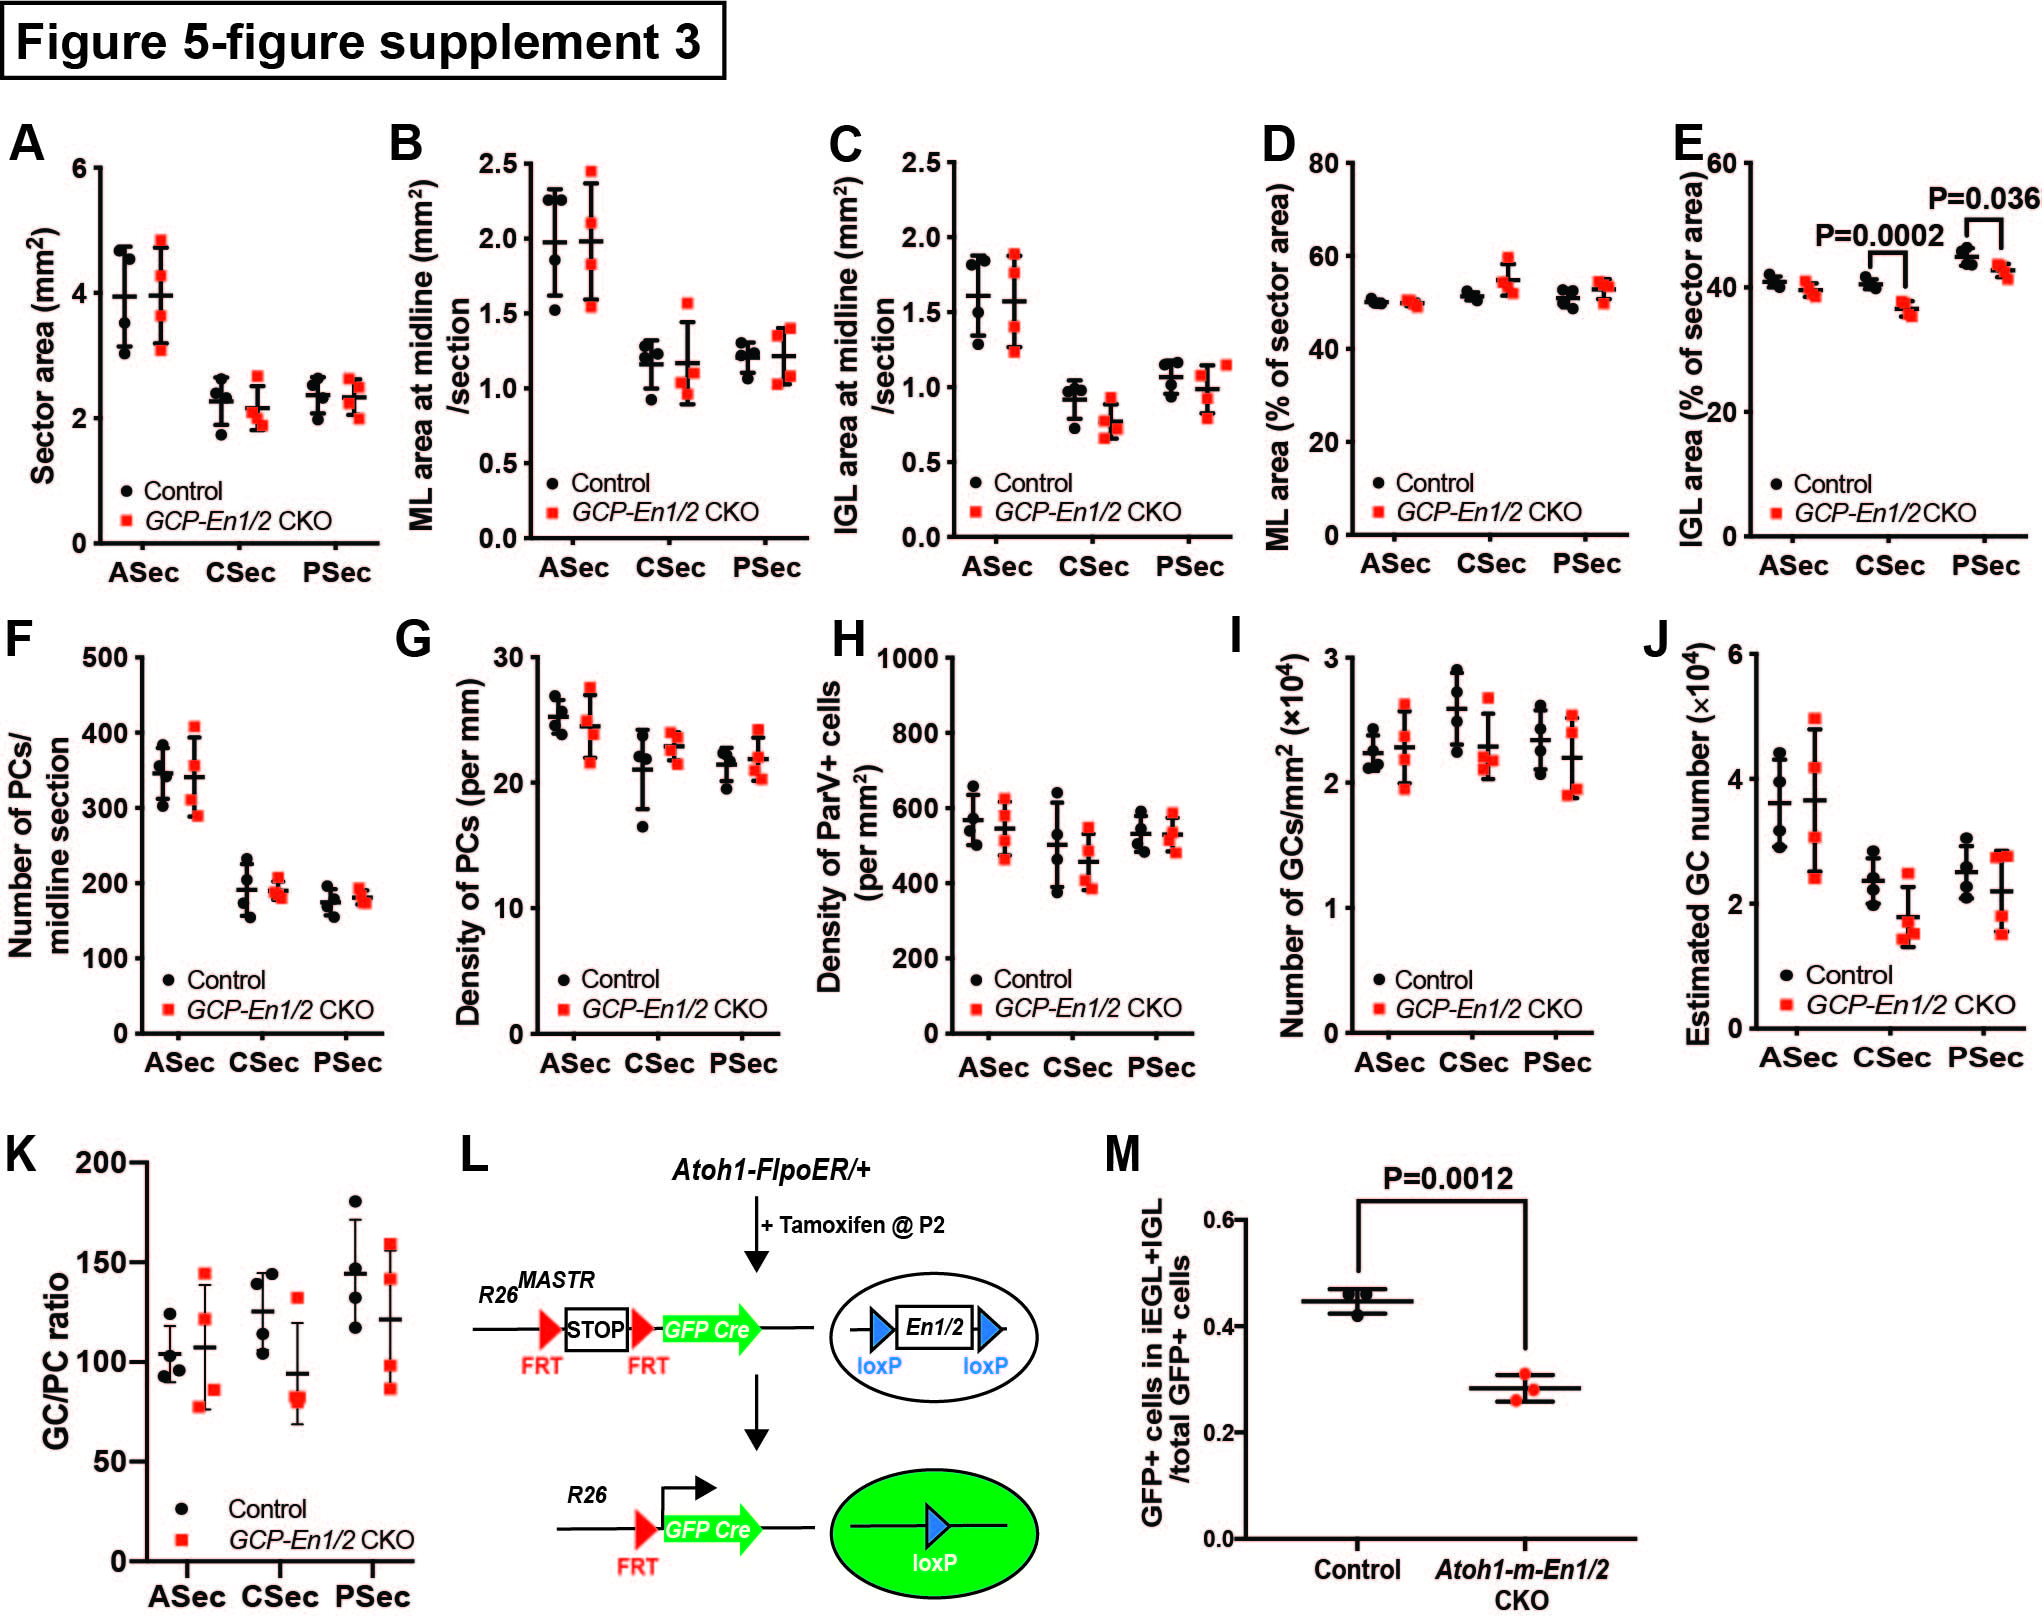

Supplement: supp [file elife-50617-supp-v1.zip › elife_poa_e50617_Figure_5_figure_supplement_3.jpg]

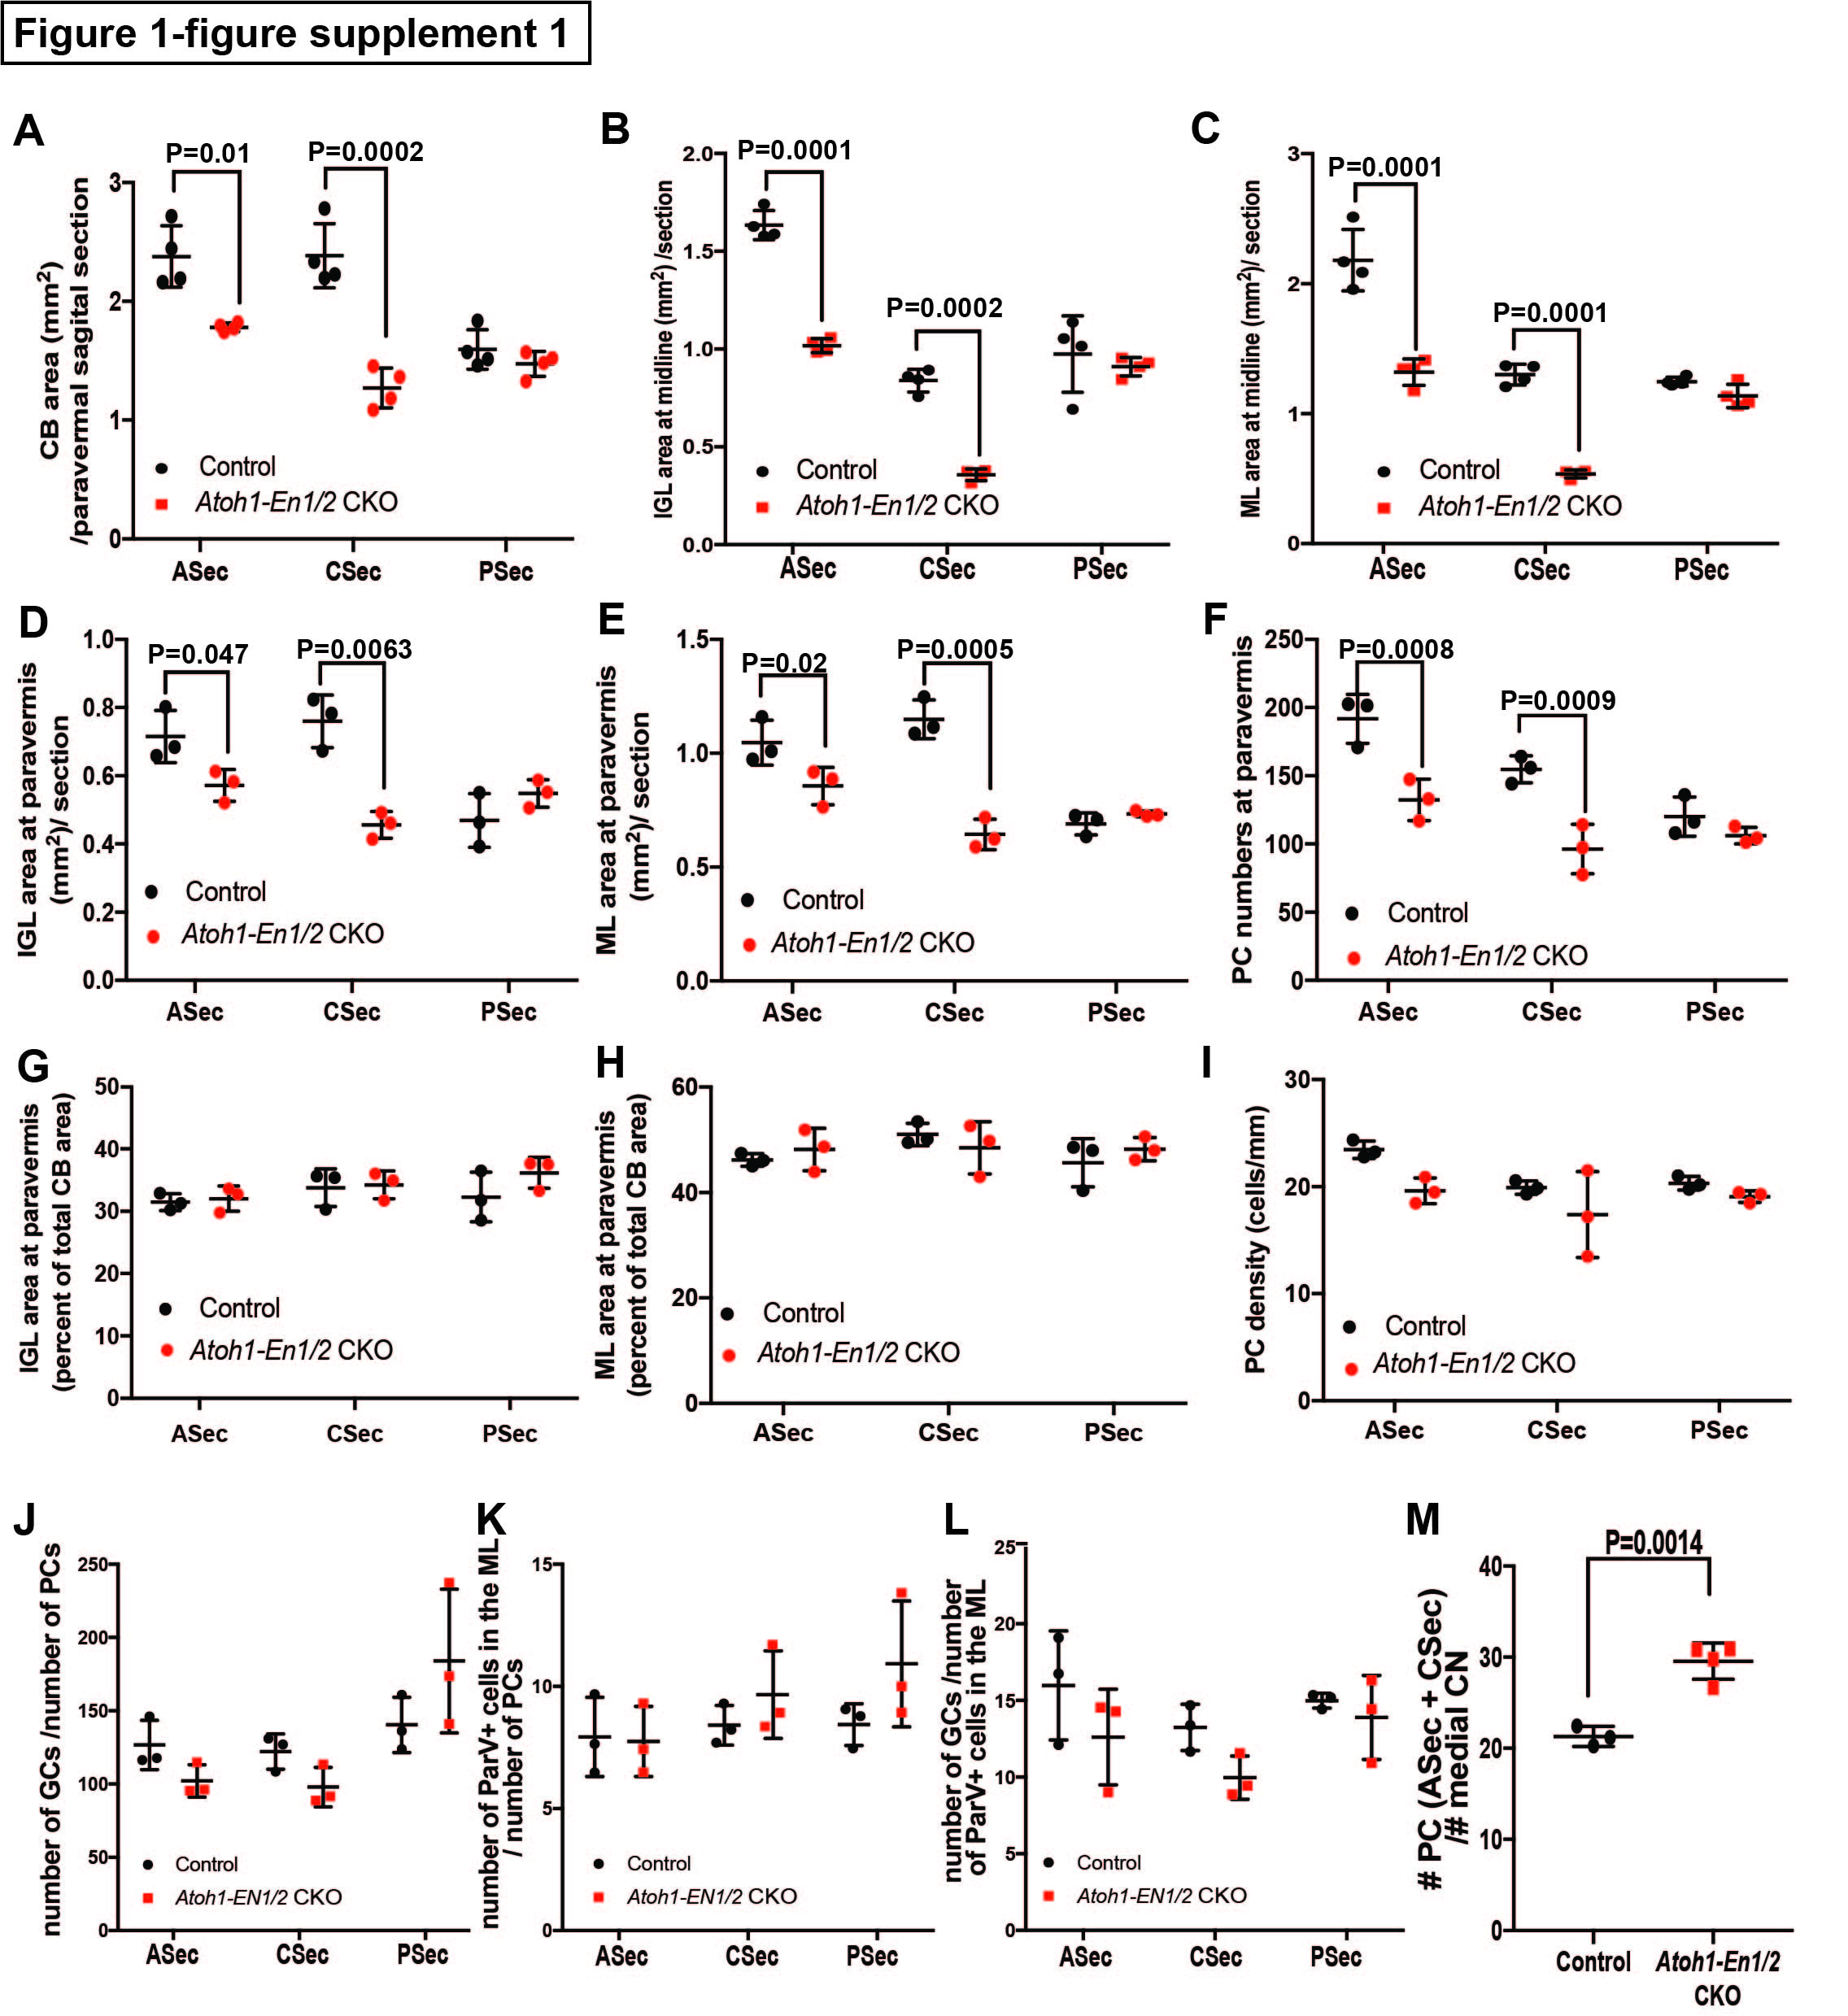

Supplement: supp [file elife-50617-supp-v1.zip › elife_poa_e50617_Figure_1_figure_supplement_1.jpg]

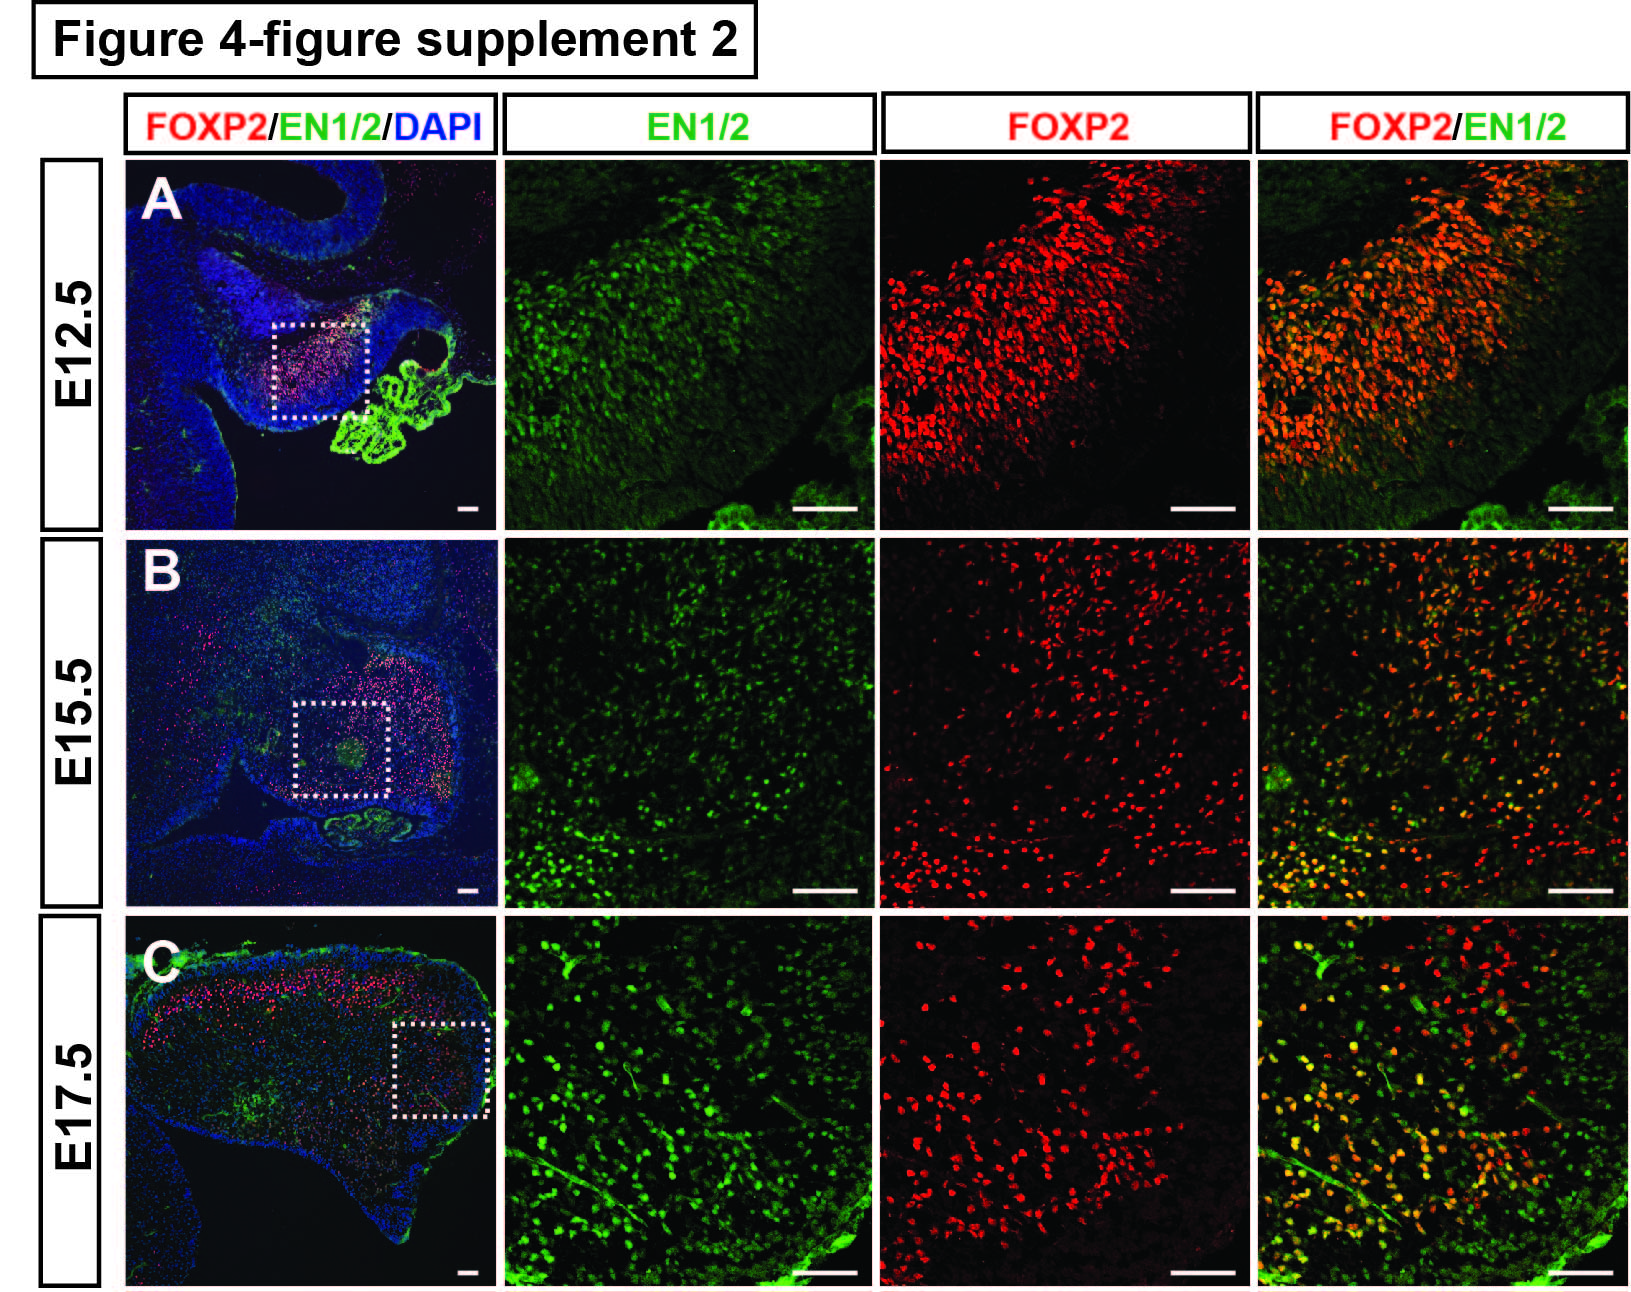

Supplement: supp [file elife-50617-supp-v1.zip › elife_poa_e50617_Figure_4_figure_supplement_2.jpg]

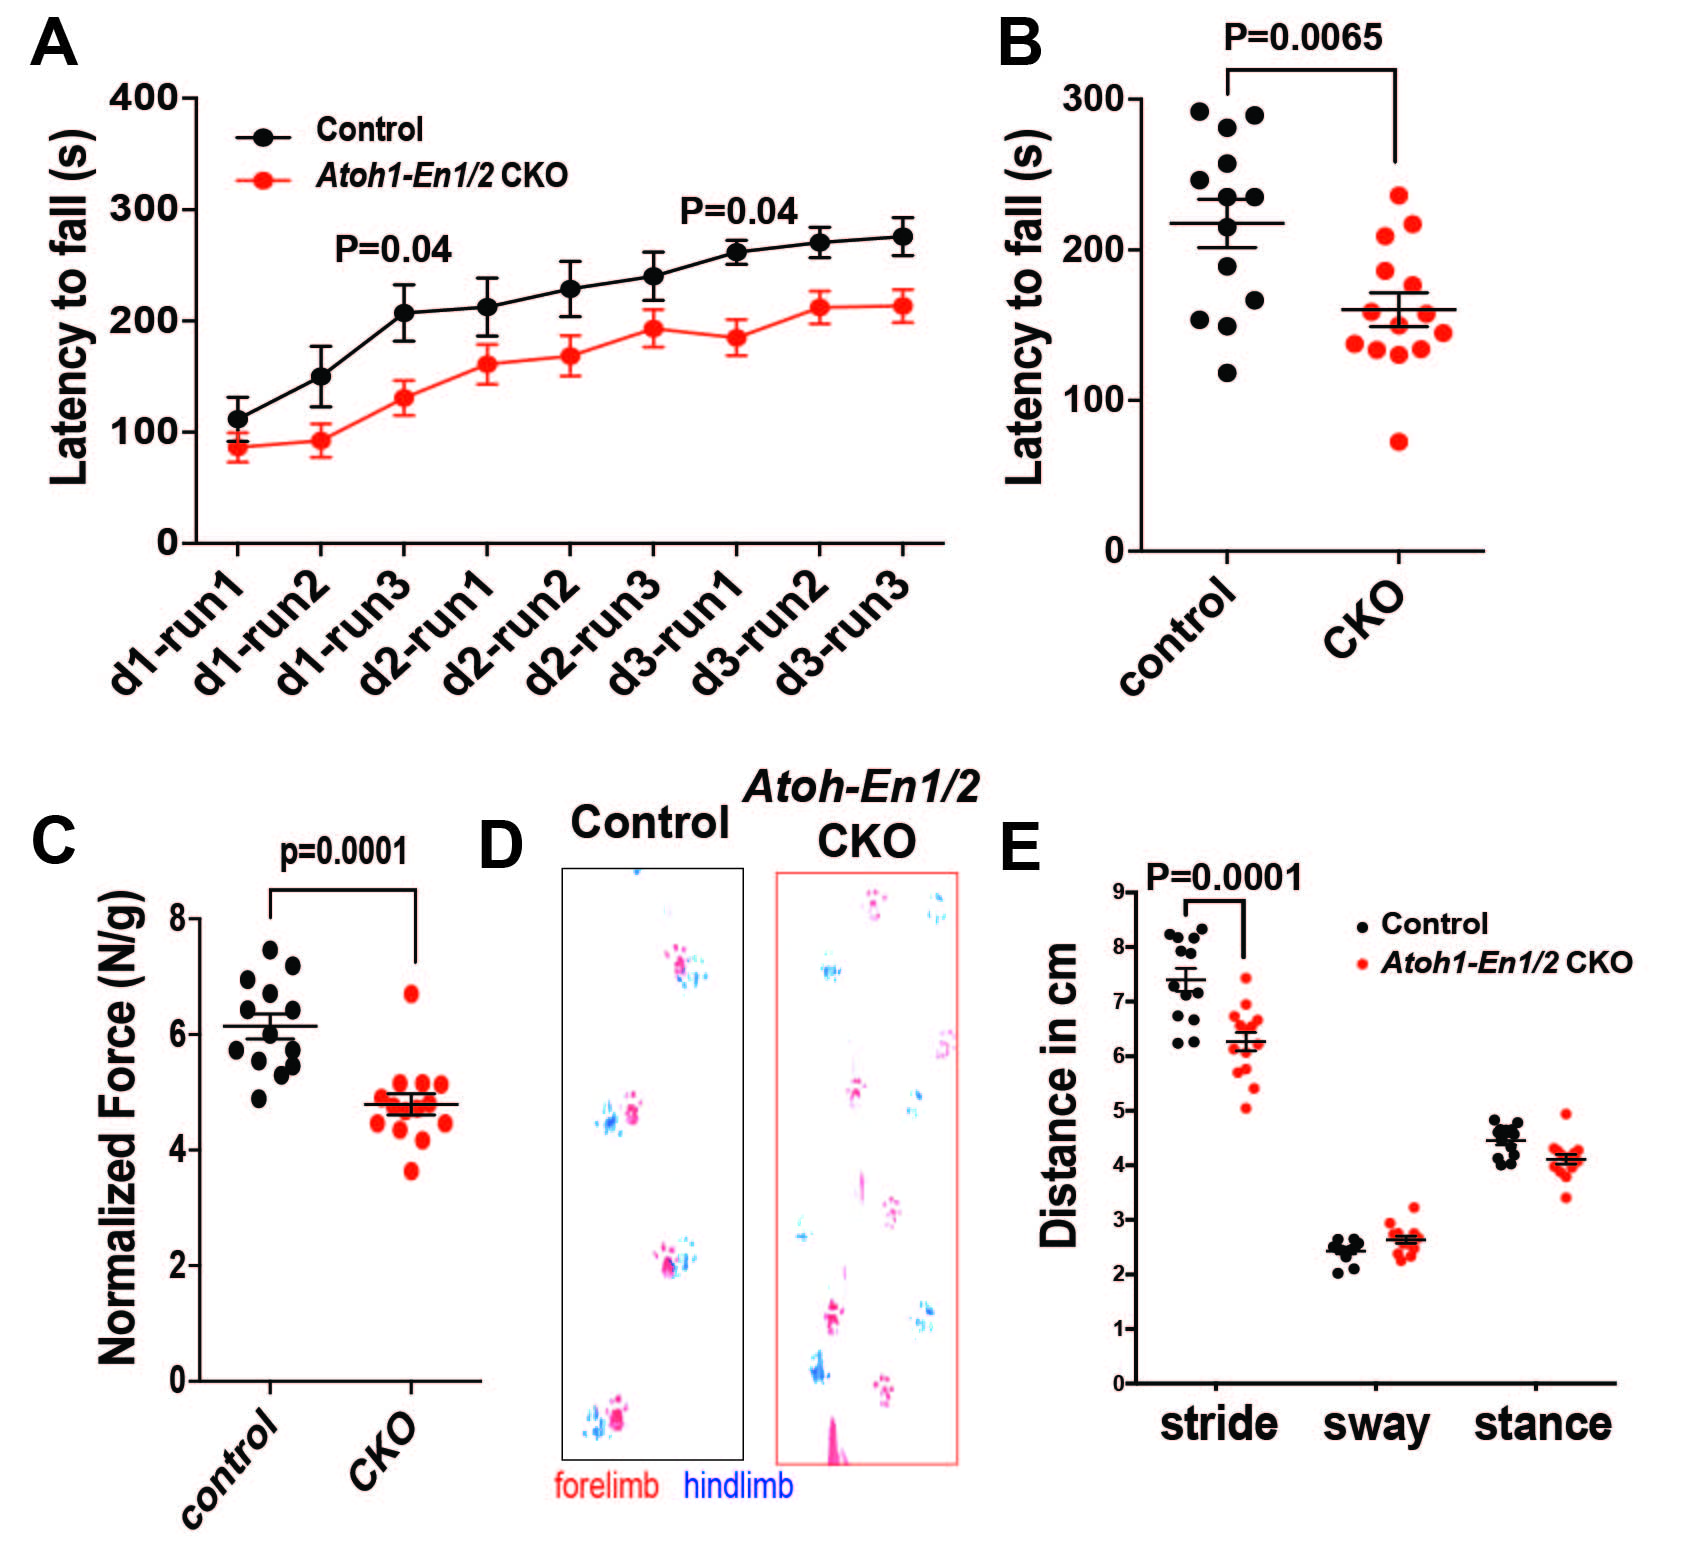

Supplement: supp [file elife-50617-supp-v1.zip › elife_poa_e50617_Figure_2_figure_supplement_1.jpg]

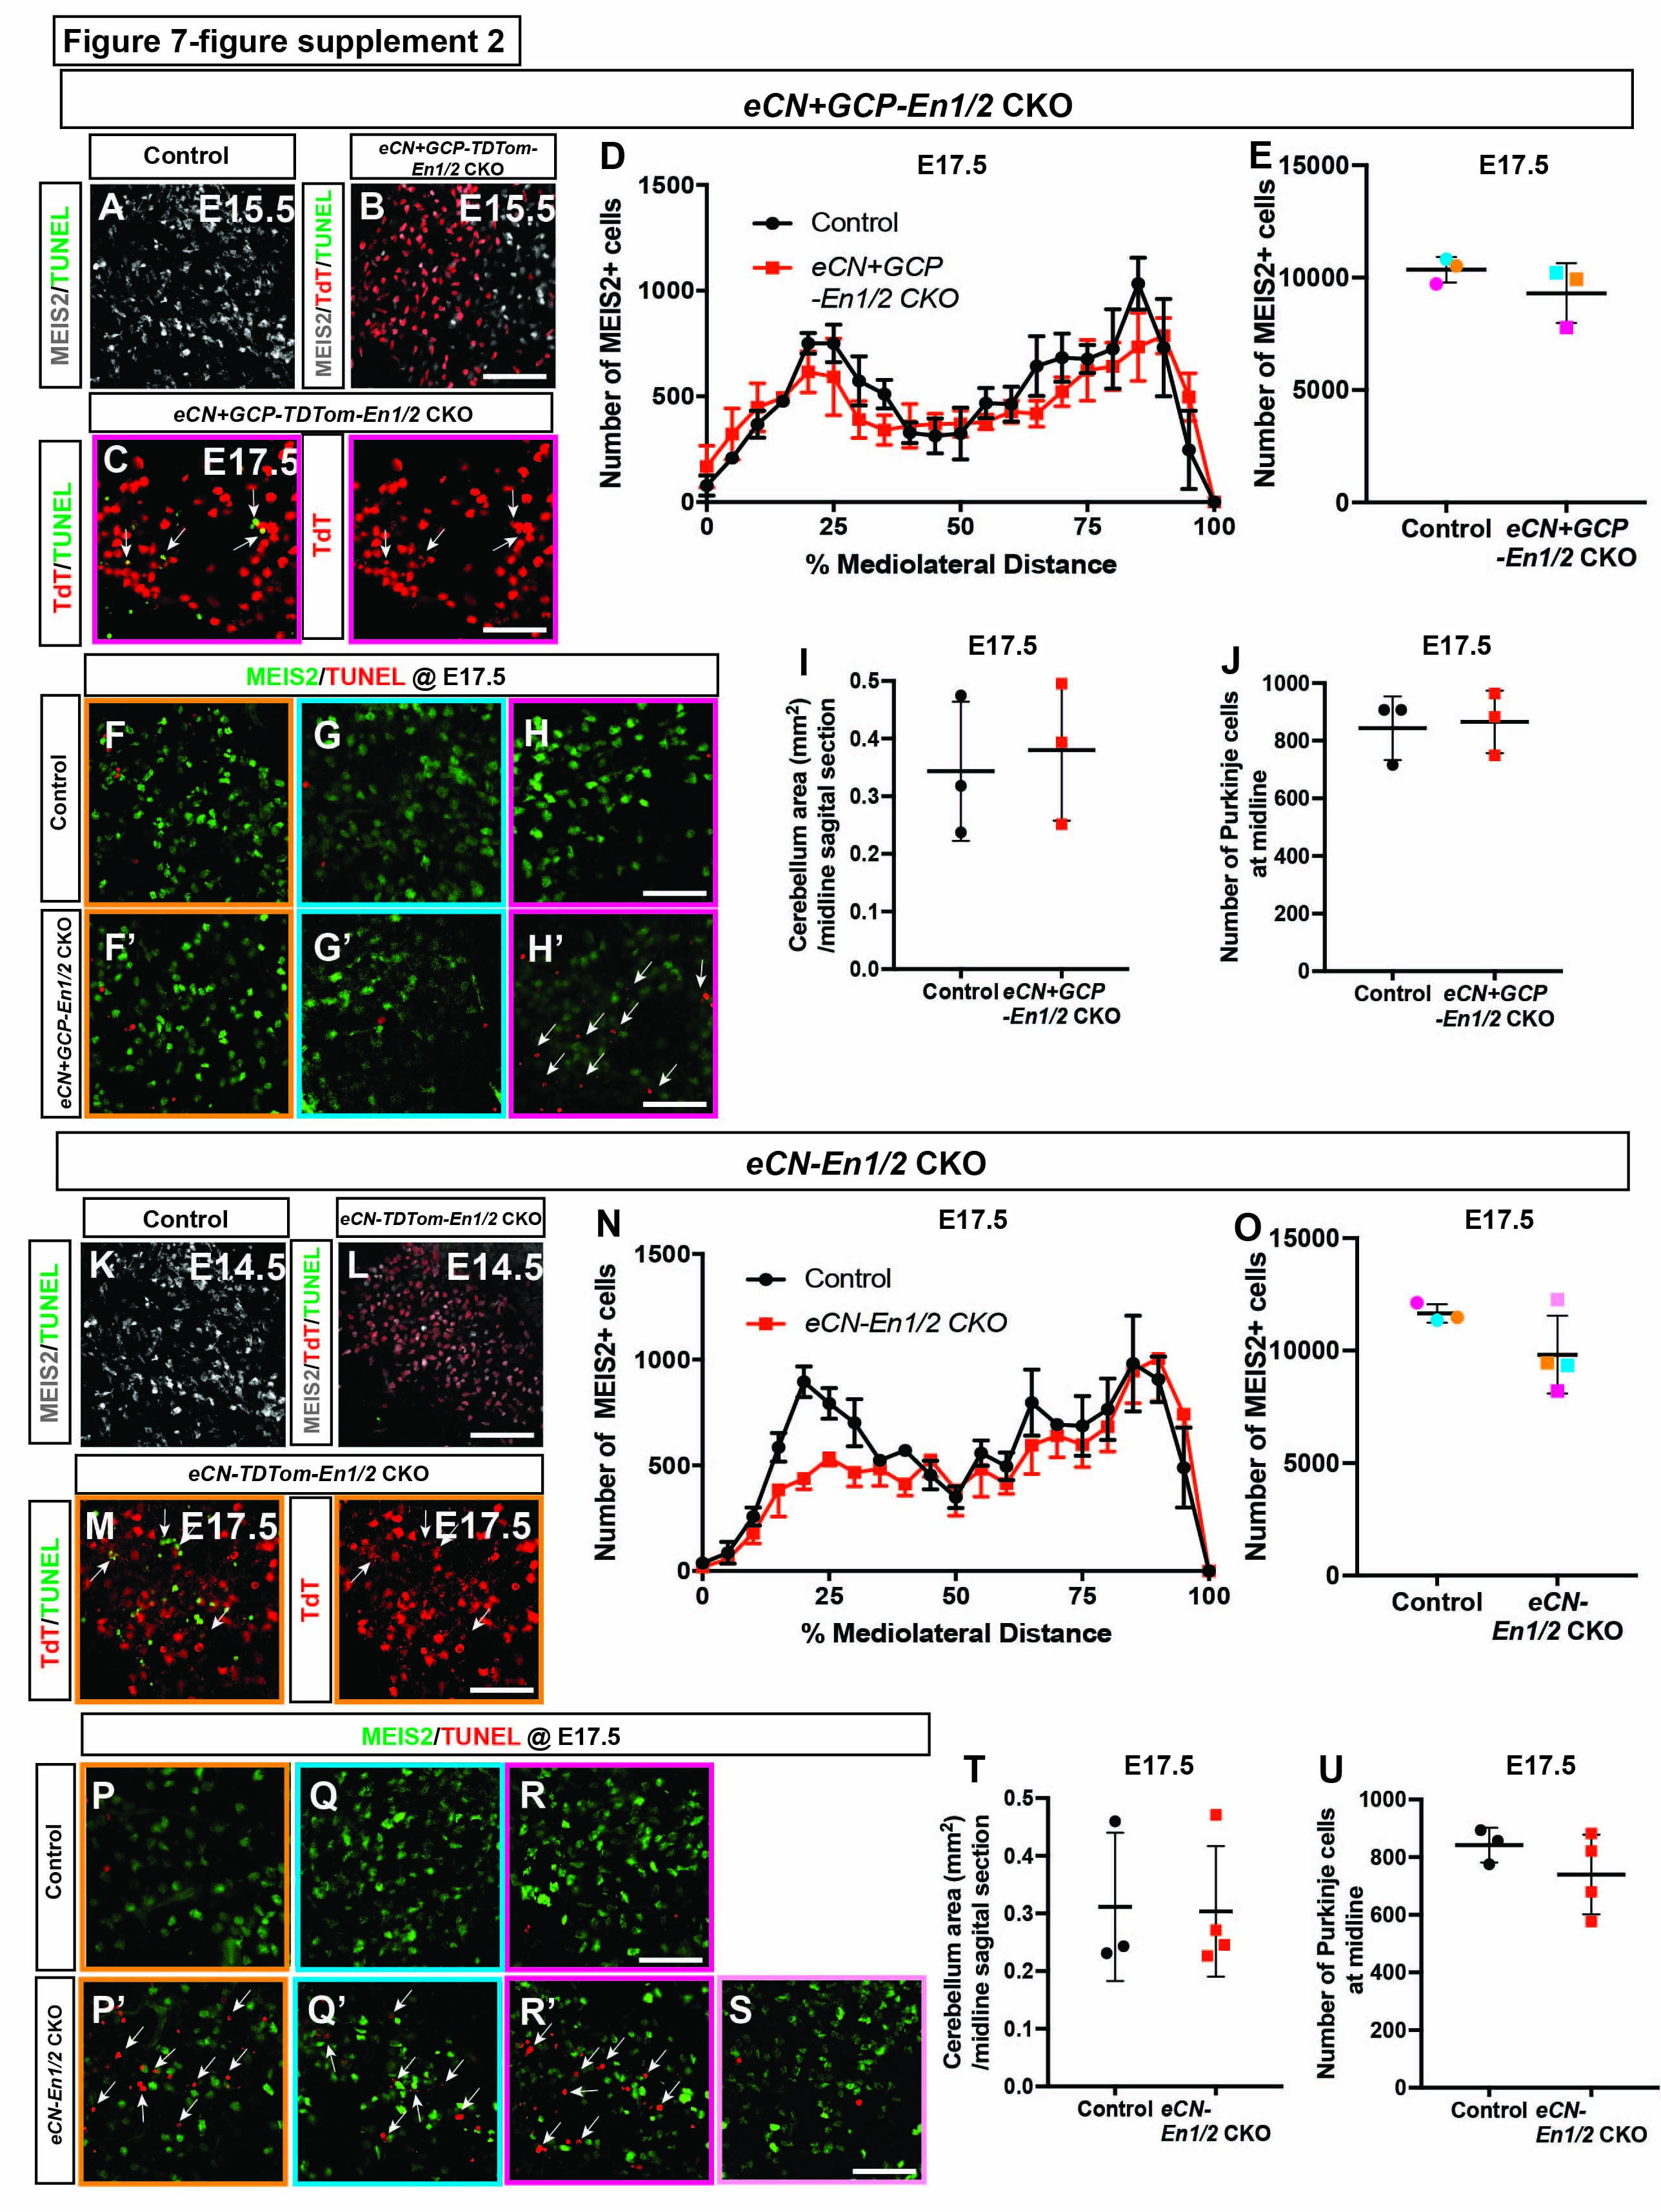

Supplement: supp [file elife-50617-supp-v1.zip › elife_poa_e50617_Figure_7_figure_supplement_2.jpg]
